# Supplementary material for: Network Analysis of Different Exogenous Hormones on the Regulation of Deep Sowing Tolerance in Maize Seedlings
Source: Front Plant Sci. 2021 Dec 2;12:739101. doi: 10.3389/fpls.2021.739101 (PMC8674439; doi:10.3389/fpls.2021.739101)
Supplement: Supplementary file 2 [file Table_1.XLSX]

## Sheet: Sheet1
Table S1 Primer sequences used for qRT-PCR analysis in this article
Gene ID	Description	Forward Primer（5' - 3'）	Reverse Primer（5' - 3'）
Zm00001d010159	Actin 1	TGAAACCTTCGAATGCCCAG	GATTGGAACCGTGTGGCTCA
Zm00001d021245	Rhodanese-like domain containing protein	TAGTGAACAGCAACCTCGCTT	CATGTATGGGACGCCAGGAG
Zm00001d029699	glutathione transferase42	AAGGGCATGGTGTATCCGTC	AGCTGAACTAACGGCGAGAC
Zm00001d018190	RING/U-box superfamily protein	CAACCAAGCCTGCATTTGCT	GTTGGTTTGATGGTGCCTGG
Zm00001d047420	DUF679 domain membrane protein 2	GTACTGCGCGTGTGTCTTTG	AGCCCGAATGAACAAGCAGA
Zm00001d004894	ribulose bisphosphate carboxylase small subunit2	CATCGGCTTCGACAACGTCA	GGTCGATCTAGCCACGGTCT
Zm00001d011833	Ferredoxin--NADP reductase leaf isozyme 1 chloroplastic	CTCAAGAAGGGCGAGCAATG	GGCGACGAGCCAACGATTT
Zm00001d010871	Thioredoxin F2 chloroplastic	CCAGGACAACAAGCCTCTCG	ACCTCCTTCACGACCTTCCC
Zm00001d026603	Magnesium-chelatase subunit ChlH chloroplastic	CGATCCGTAACCCGAAGGTG	ACGATCTTGGCGCTCTTCAA
Zm00001d031878	Early nodulin 75 protein [Source:UniProtKB/TrEMBL;Acc:B4FNV9]	AACCGACGCTGCAACTAGAA	TTGGTTCCGGTTTAGGCTCC
Zm00001d012810	sigma-like factor6	ATCCCGCACCACAGTTCCA	GTCAAGGTGTCTTTGGAGCC
