# Supplementary material for: Network Analysis of Different Exogenous Hormones on the Regulation of Deep Sowing Tolerance in Maize Seedlings
Source: Front Plant Sci. 2021 Dec 2;12:739101. doi: 10.3389/fpls.2021.739101 (PMC8674439; doi:10.3389/fpls.2021.739101)
Supplement: Supplementary file 3 [file Table_2.XLSX]

## Sheet: Sheet1
Table S2 Quality control of the total RNA for RNA-Seq
Sample	OD.260/280	OD.260/230	Conc. (µg/µL)	Amount (µg)	RIN value
QCK1	2.069	0.846	0.1266	4.0512	6.8
QCK2	2.077	1.12	0.148	4.7347	7
QCK3	2.11	1.894	0.1795	5.7446	7
QDS1	2.106	1.783	0.1665	5.3274	7.9
QDS2	2.052	1.856	0.165	5.2813	7.1
QDS3	2.076	1.469	0.1459	4.6682	8
QCKGA1	2.12	1.886	0.1971	6.3078	7.7
QCKGA2	2.104	1.574	0.185	5.92	7.5
QCKGA3	2.122	1.854	0.257	8.224	8.2
QDSGA1	2.077	1.652	0.1556	4.9792	8
QDSGA2	2.067	1.802	0.1562	4.9971	8.1
QDSGA3	2.094	1.541	0.1776	5.6819	8.7
QCKBR1	2.097	1.787	0.2113	6.761	2.7
QCKBR2	2.103	1.467	0.141	4.5107	6.4
QCKBR3	2.079	1.716	0.1976	6.3245	8.5
QDSBR1	2.076	1.449	0.1631	5.2198	8.8
QDSBR2	2.044	0.684	0.1163	3.7222	2.5
QDSBR3	2.069	0.669	0.1814	5.8061	8.7
QCKSL1	2.09	1.158	0.1675	5.3594	7.9
QCKSL2	2.091	1.773	0.1452	4.6464	7.9
QCKSL3	2.077	1.92	0.1409	4.5094	8.2
QDSSL1	2.093	1.276	0.1604	5.1315	7.6
QDSSL2	2.08	1.246	0.1572	5.0291	8
QDSSL3	2.073	1.255	0.1011	3.2346	9.1
ZCK1	2.076	1.474	0.2155	6.8966	7.5
ZCK2	2.092	2.043	0.2472	7.9117	5.3
ZCK3	2.103	2.086	0.2445	7.8234	7.7
ZDS1	2.092	1.168	0.2885	9.2314	7
ZDS2	2.086	1.34	0.2251	7.2026	6.8
ZDS3	2.107	1.508	0.2488	7.9629	7
ZCKGA1	2.101	1.767	0.3062	9.7997	5.5
ZCKGA2	2.119	1.287	0.3654	11.6915	5.6
ZCKGA3	2.124	1.985	0.3417	10.935	3.2
ZDSGA1	2.077	1.267	0.258	8.2547	8
ZDSGA2	2.101	1.889	0.2253	7.209	5.8
ZDSGA3	2.094	1.188	0.1813	5.801	5.8
ZCKBR1	2.101	0.956	0.2384	7.6301	7.7
ZCKBR2	2.109	1.535	0.2775	8.8806	7.8
ZCKBR3	2.088	1.296	0.2486	7.9565	8.2
ZDSBR1	2.082	1.422	0.2175	6.9594	7.8
ZDSBR2	2.096	1.234	0.2424	7.7555	7.7
ZDSBR3	2.041	1.025	0.177	5.6653	8.4
ZCKSL1	2.101	1.624	0.3648	11.6736	8.3
ZCKSL2	2.095	1.845	0.2792	8.9357	8.1
ZCKSL3	2.118	1.796	0.3261	10.4346	9
ZDSSL1	2.093	1.45	0.2231	7.1386	8.3
ZDSSL2	2.085	1.766	0.2343	7.4982	9.3
ZDSSL3	2.105	1.851	0.282	9.0253	7.9
