# Supplementary material for: Network Analysis of Different Exogenous Hormones on the Regulation of Deep Sowing Tolerance in Maize Seedlings
Source: Front Plant Sci. 2021 Dec 2;12:739101. doi: 10.3389/fpls.2021.739101 (PMC8674439; doi:10.3389/fpls.2021.739101)
Supplement: Supplementary file 4 [file Table_3.XLSX]

## Sheet: Sheet1
Table S3 Summary of sequencing data and genome mapping information
Sample	Raw Data	Valid Data	Valid Ratio(reads)	Q20%	Q30%	GC content%	Mapped reads	Unique Mapped reads
QCK1	47292578	44124738	93.3	99.97	97.68	51.5	38008767(86.14%)	28319914(64.18%)
QCK2	39791952	37696380	94.73	99.97	97.74	51.5	32411617(85.98%)	24110237(63.96%)
QCK3	39824108	37734838	94.75	99.97	97.69	51.5	32657592(86.54%)	24352713(64.54%)
QCKBR1	51516086	49259856	95.62	99.97	97.7	51.5	41782437(84.82%)	31077847(63.09%)
QCKBR2	55845626	52702114	94.37	99.97	97.78	50.5	45622086(86.57%)	34056317(64.62%)
QCKBR3	52342500	50708364	96.88	99.98	97.56	50.5	43474823(85.74%)	32325167(63.75%)
QCKGA1	41512522	40002472	96.36	99.97	97.5	51.5	34867128(87.16%)	26011829(65.03%)
QCKGA2	44660098	42711504	95.64	99.97	97.74	51.5	37488360(87.77%)	27851529(65.21%)
QCKGA3	51728976	49423424	95.54	99.98	97.75	51.5	42618389(86.23%)	31853224(64.45%)
QCKSL1	33472982	32041022	95.72	99.97	97.58	51	27527379(85.91%)	20382293(63.61%)
QCKSL2	47551022	45140022	94.93	99.97	97.53	50.5	38549540(85.40%)	28680672(63.54%)
QCKSL3	42720378	40827744	95.57	99.97	97.59	50.5	35382847(86.66%)	26329606(64.49%)
QDS1	52846992	50844112	96.21	99.97	97.73	51.5	44406775(87.34%)	32949401(64.80%)
QDS2	53644510	51102052	95.26	99.97	97.64	51.5	44002017(86.11%)	32598867(63.79%)
QDS3	52815144	50665220	95.93	99.97	97.81	51.5	42057278(83.01%)	31185336(61.55%)
QDSBR1	51334224	49117598	95.68	99.97	97.76	51.5	43009067(87.56%)	32173615(65.50%)
QDSBR2	42608976	40827480	95.82	99.97	97.62	51.5	35862660(87.84%)	26662687(65.31%)
QDSBR3	48441100	46959646	96.94	99.98	97.96	52	40716481(86.71%)	30141131(64.19%)
QDSGA1	45623912	43660442	95.7	99.97	97.72	51.5	37999149(87.03%)	28468156(65.20%)
QDSGA2	43703152	42114872	96.37	99.97	97.75	51	36691837(87.12%)	27343172(64.93%)
QDSGA3	49703384	48003426	96.58	99.98	97.73	52	41892172(87.27%)	31024599(64.63%)
QDSSL1	42581372	40907046	96.07	99.97	97.7	52	35574366(86.96%)	26357185(64.43%)
QDSSL2	46618504	44252200	94.92	99.97	97.4	51.5	38126445(86.16%)	28500746(64.41%)
QDSSL3	38643162	37173822	96.2	99.97	97.66	51	32380963(87.11%)	24003477(64.57%)
ZCK1	41153732	37821190	91.9	99.97	97.54	51.5	29298840(77.47%)	21970198(58.09%)
ZCK2	32754154	31079574	94.89	99.97	97.67	51.5	24759813(79.67%)	18345096(59.03%)
ZCK3	32866736	31383254	95.49	99.97	97.68	51.5	26630336(84.86%)	19713126(62.81%)
ZCKBR1	36599294	34864056	95.26	99.97	97.6	51.5	29318719(84.09%)	21770632(62.44%)
ZCKBR2	50883988	48691562	95.69	99.97	97.73	51	41105456(84.42%)	30173528(61.97%)
ZCKBR3	34165502	32888250	96.26	99.97	97.45	51.5	24616058(74.85%)	18217168(55.39%)
ZCKGA1	36847502	34786896	94.41	99.97	97.37	50.5	28382124(81.59%)	21042061(60.49%)
ZCKGA2	42597634	40879134	95.97	99.97	97.67	51.5	32990653(80.70%)	24261480(59.35%)
ZCKGA3	41254502	38840570	94.15	99.97	97.52	50.5	32336466(83.25%)	24053875(61.93%)
ZCKSL1	39386316	37961780	96.38	99.97	97.57	50.5	31968479(84.21%)	23409783(61.67%)
ZCKSL2	39526242	37932578	95.97	99.97	97.55	50.5	31974595(84.29%)	23479507(61.90%)
ZCKSL3	45174022	43159358	95.54	99.97	97.53	51	36298110(84.10%)	26675309(61.81%)
ZDS1	43618284	41507870	95.16	99.97	97.68	51.5	35637223(85.86%)	26372186(63.54%)
ZDS2	51642466	48219350	93.37	99.97	97.65	51.5	41088103(85.21%)	30485097(63.22%)
ZDS3	43200882	39723260	91.95	99.97	97.71	51.5	33621537(84.64%)	24999918(62.94%)
ZDSBR1	43776950	41680334	95.21	99.97	97.64	50.5	35246434(84.56%)	25919190(62.19%)
ZDSBR2	45479230	43486066	95.62	99.97	97.6	51.5	36830924(84.70%)	27029444(62.16%)
ZDSBR3	39960870	38043500	95.2	99.97	97.63	50.5	32400074(85.17%)	23763428(62.46%)
ZDSGA1	44437354	42505544	95.65	99.98	97.93	51.5	36341868(85.50%)	27047838(63.63%)
ZDSGA2	34114214	31354278	91.91	99.97	97.83	53.5	26668291(85.05%)	20256598(64.61%)
ZDSGA3	41336194	39447242	95.43	99.97	97.59	51.5	31409977(79.63%)	23334973(59.15%)
ZDSSL1	55100772	53255474	96.65	99.97	97.67	51.5	42574831(79.94%)	30997691(58.21%)
ZDSSL2	40682526	39582666	97.3	99.97	97.41	51.5	34335167(86.74%)	25033116(63.24%)
ZDSSL3	38091024	36930374	96.95	99.98	97.62	51	30560840(82.75%)	22237219(60.21%)
Note: Sample, sample name; Raw Data reads, Total number of reads data after; Valid reads, quality control data; Mapped reads, can be compared to the number of reads on the genome; Unique Mapped reads, can only compare the number of reads to one location in the genome.
