# Supplementary material for: Network Analysis of Different Exogenous Hormones on the Regulation of Deep Sowing Tolerance in Maize Seedlings
Source: Front Plant Sci. 2021 Dec 2;12:739101. doi: 10.3389/fpls.2021.739101 (PMC8674439; doi:10.3389/fpls.2021.739101)
Supplement: Supplementary file 5 [file Table_4.XLSX]

## Sheet: Sheet1
Table S4 Annotation statistics of KEGG metabolic pathway
Comparison groups	DEGs with pathway annotation	Number of pathway	Number of significant enriched pathway
QDS vs. QCK	584	108	25
QDSGA vs. QCKGA	293	90	15
QDSBR vs. QCKBR	501	101	13
QDSSL vs. QCKSL	625	113	21
ZDS vs. ZCK	357	94	13
ZDSGA vs. ZCKGA	410	107	12
ZDSBR vs. ZCKBR	338	91	19
ZDSSL vs. ZCKSL	517	111	19
