# Supplementary material for: Network Analysis of Different Exogenous Hormones on the Regulation of Deep Sowing Tolerance in Maize Seedlings
Source: Front Plant Sci. 2021 Dec 2;12:739101. doi: 10.3389/fpls.2021.739101 (PMC8674439; doi:10.3389/fpls.2021.739101)
Supplement: Supplementary file 6 [file Table_5.XLSX]

## Sheet: Sheet1
Table S5 Hub genes in the purple and darkred module
Modules	gene_id	Description	QDS vs QCK	QDSGA vs QCKGA	QDSBR vs QCKBR	QDSSL vs QCKSL	ZDS vs ZCK	ZDSGA vs ZCKGA	ZDSBR vs ZCKBR	ZDSSL vs ZCKSL	GO
Mepurple	Zm00001d020638	Protein GAMETE EXPRESSED 1	4.13872	1.58426	1.64122	4.87417	0.469508	-0.150744	-0.207805	1.96798	GO:0016787(hydrolase activity)
Mepurple	Zm00001d021898	recombination protein51 gene a	2.91115	1.21177	1.22594	2.91525	-0.17249	0.710371	-0.404736	1.71541	GO:0004553(hydrolase activity, hydrolyzing O-glycosyl compounds);GO:0004565(beta-galactosidase activity);GO:0005618(cell wall);GO:0005975(carbohydrate metabolic process);GO:0008152(metabolic process);GO:0009505(plant-type cell wall);GO:0016787(hydrolase activity);GO:0016798(hydrolase activity, acting on glycosyl bonds);GO:0030246(carbohydrate binding);GO:0030246(carbohydrate binding)
Mepurple	Zm00001d028231	Sec14p-like phosphatidylinositol transfer family protein	4.43765	3.9479	2.60613	6.46613	1.54043	2.68501	1.90943	1.6583	GO:0000149(SNARE binding);GO:0005543(phospholipid binding);GO:0005545(1-phosphatidylinositol binding);GO:0005546(phosphatidylinositol-4,5-bisphosphate binding);GO:0005886(plasma membrane);GO:0005905(clathrin-coated pit);GO:0006897(endocytosis);GO:0006900(vesicle budding from membrane);GO:0030136(clathrin-coated vesicle);GO:0030276(clathrin binding);GO:0032050(clathrin heavy chain binding);GO:0048…
Mepurple	Zm00001d028307	Probable inactive poly [ADP-ribose] polymerase SRO1	3.41261	2.27343	1.7328	2.50984	0.736985	-0.130222	0.215655	0.916749	GO:0003723(RNA binding);GO:0004521(endoribonuclease activity);GO:0005576(extracellular region);GO:0006401(RNA catabolic process);GO:0033897(ribonuclease T2 activity);GO:0090502(RNA phosphodiester bond hydrolysis, endonucleolytic)
Mepurple	Zm00001d031760	Clathrin assembly protein	3.09127	2.86739	1.45083	4.4818	2.17431	2.87646	1.99523	1.76631	GO:0030276(clathrin binding)
Medarkred	Zm00001d032186	Ribonuclease 1	3.75283	3.12522	2.73263	5.5528	1.40456	2.09411	1.44567	1.1679	GO:0003950(NAD+ ADP-ribosyltransferase activity)
Medarkred	Zm00001d038351	Adenine nucleotide alpha hydrolases-like superfamily protein	2.79955	1.60934	2.19783	2.78917	1.58788	1.68464	1.29903	1.14126	GO:0016020(membrane);GO:0016021(integral component of membrane);GO:0016021(integral component of membrane)
Medarkred	Zm00001d041880	Beta-galactosidase 9	2.30164	1.55734	1.06743	2.25253	0.569793	1.06025	0.79375	0.120314	GO:0003676(nucleic acid binding)
Medarkred	Zm00001d042468	Structural maintenance of chromosomes protein 2-2	0.98511	0.788278	0.793884	1.30924	1.1023	0.873769	0.942602	0.36651	GO:0005515(protein binding);GO:0005524(ATP binding);GO:0005694(chromosome);GO:0016020(membrane);GO:0016021(integral component of membrane);GO:0051276(chromosome organization);GO:0051276(chromosome organization)
Medarkred	Zm00001d042933	Zinc finger protein ZAT11	6.00278	2.9084	3.06059	6.66317	-0.151505	-0.832397	-1.3632	2.05168	GO:0000150(recombinase activity);GO:0000166(nucleotide binding);GO:0000724(double-strand break repair via homologous recombination);GO:0000730(DNA recombinase assembly);GO:0000794(condensed nuclear chromosome);GO:0003677(DNA binding);GO:0003690(double-stranded DNA binding);GO:0003697(single-stranded DNA binding);GO:0005524(ATP binding);GO:0005634(nucleus);GO:0006259(DNA metabolic process);GO:0006…
