# Supplementary material for: Network Analysis of Different Exogenous Hormones on the Regulation of Deep Sowing Tolerance in Maize Seedlings
Source: Front Plant Sci. 2021 Dec 2;12:739101. doi: 10.3389/fpls.2021.739101 (PMC8674439; doi:10.3389/fpls.2021.739101)
Supplement: Supplementary file 7 [file Table_6.XLSX]

## Sheet: Sheet1
Up or down regulated glucanase in Qi319 under deep sowing stress
gene_id	gene_name	transcript_id	GO	KEGG	KO_ENTRY	EC	Description	trans_type	FPKM.QDS1	FPKM.QDS2	FPKM.QDS3	FPKM.QCK1	FPKM.QCK2	FPKM.QCK3	fc	log2(fc)	pval	qval	regulation	significant
Zm00001d037338	Zm00001d037338	Zm00001d037338_T001;Zm00001d037338_T002	GO:0000272(polysaccharide catabolic process);GO:0003824(catalytic activity);GO:0004553(hydrolase activity, hydrolyzing O-glycosyl compounds);GO:0005975(carbohydrate metabolic process);GO:0008152(metabolic process);GO:0008810(cellulase activity);GO:0016787(hydrolase activity);GO:0016798(hydrolase activity, acting on glycosyl bonds);GO:0030245(cellulose catabolic process);GO:0030245(cellulose catab…	00500(Starch and sucrose metabolism);00500(Starch and sucrose metabolism)	K01179	EC:3.2.1.4	Endoglucanase 8	protein_coding	1.67789	3.50888	1.21635	0.0001	0.0001	0.0001	21343.7	14.3815	3.04753e-15	2.2282e-13	up	yes
Zm00001d026605	Zm00001d026605	Zm00001d026605_T001	GO:0000272(polysaccharide catabolic process);GO:0003824(catalytic activity);GO:0004553(hydrolase activity, hydrolyzing O-glycosyl compounds);GO:0005975(carbohydrate metabolic process);GO:0008152(metabolic process);GO:0008810(cellulase activity);GO:0016787(hydrolase activity);GO:0016798(hydrolase activity, acting on glycosyl bonds);GO:0030245(cellulose catabolic process);GO:0030246(carbohydrate bi…	00500(Starch and sucrose metabolism)	K01179	EC:3.2.1.4	Endoglucanase 5	protein_coding	1.09711	0.601162	0.360983	0.0001	0.0001	0.0001	6864.17	12.7449	4.06073e-10	1.28497e-08	up	yes
Zm00001d015067	Zm00001d015067	Zm00001d015067_T001	GO:0000272(polysaccharide catabolic process);GO:0003824(catalytic activity);GO:0004553(hydrolase activity, hydrolyzing O-glycosyl compounds);GO:0005975(carbohydrate metabolic process);GO:0008152(metabolic process);GO:0008810(cellulase activity);GO:0016787(hydrolase activity);GO:0016798(hydrolase activity, acting on glycosyl bonds);GO:0030245(cellulose catabolic process)	NA	NA	NA	Endoglucanase 1	protein_coding	0.872368	0.685542	0.308628	0.0001	0.0001	0.0001	6221.79	12.6031	5.66083e-09	1.41479e-07	up	yes
Zm00001d021304	Zm00001d021304	Zm00001d021304_T001	GO:0000272(polysaccharide catabolic process);GO:0003824(catalytic activity);GO:0004553(hydrolase activity, hydrolyzing O-glycosyl compounds);GO:0005975(carbohydrate metabolic process);GO:0008152(metabolic process);GO:0008810(cellulase activity);GO:0016020(membrane);GO:0016021(integral component of membrane);GO:0016787(hydrolase activity);GO:0016798(hydrolase activity, acting on glycosyl bonds);GO…	NA	NA	NA	Endoglucanase 2	protein_coding	19.4245	11.7325	15.0855	28.2185	35.2848	52.8878	0.397303	-1.33169	1.8365e-05	0.00022287	down	yes
Zm00001d033917	Zm00001d033917	Zm00001d033917_T001	GO:0000272(polysaccharide catabolic process);GO:0003824(catalytic activity);GO:0004553(hydrolase activity, hydrolyzing O-glycosyl compounds);GO:0005975(carbohydrate metabolic process);GO:0008152(metabolic process);GO:0008810(cellulase activity);GO:0016020(membrane);GO:0016021(integral component of membrane);GO:0016787(hydrolase activity);GO:0016798(hydrolase activity, acting on glycosyl bonds);GO…	NA	NA	NA	Endo-1%2C4-beta-glucanase Cel1	protein_coding	46.4974	24.8542	30.7233	64.5536	85.6802	86.5001	0.43118	-1.21364	4.78143e-05	0.000522849	down	yes
Zm00001d013319	Zm00001d013319	Zm00001d013319_T001	GO:0000272(polysaccharide catabolic process);GO:0003824(catalytic activity);GO:0004553(hydrolase activity, hydrolyzing O-glycosyl compounds);GO:0005975(carbohydrate metabolic process);GO:0008152(metabolic process);GO:0008810(cellulase activity);GO:0016020(membrane);GO:0016021(integral component of membrane);GO:0016787(hydrolase activity);GO:0016798(hydrolase activity, acting on glycosyl bonds);GO…	NA	NA	NA	Endoglucanase 25	protein_coding	110.855	63.4797	66.3342	153.29	142.015	190.887	0.495008	-1.01448	0.000541895	0.0043394	down	yes
Zm00001d013269	beta-glucanase3	Zm00001d013269_T001	GO:0004553(hydrolase activity, hydrolyzing O-glycosyl compounds);GO:0005975(carbohydrate metabolic process);GO:0008422(beta-glucosidase activity);GO:0009251(glucan catabolic process);GO:0016787(hydrolase activity)	00460(Cyanoamino acid metabolism);00500(Starch and sucrose metabolism);00940(Phenylpropanoid biosynthesis)	K05349	EC:3.2.1.21	beta-glucanase3	protein_coding	6.30551	2.71854	4.41757	10.4832	8.61873	14.0168	0.405862	-1.30094	0.000607772	0.00478875	down	yes
Zm00001d042140	Zm00001d042140	Zm00001d042140_T001	GO:0004338(glucan exo-1,3-beta-glucosidase activity);GO:0004553(hydrolase activity, hydrolyzing O-glycosyl compounds);GO:0005975(carbohydrate metabolic process);GO:0008152(metabolic process);GO:0016787(hydrolase activity);GO:0016798(hydrolase activity, acting on glycosyl bonds);GO:0042973(glucan endo-1,3-beta-D-glucosidase activity);GO:0046658(anchored component of plasma membrane)	NA	NA	NA	Beta-1%2C3-glucanase	protein_coding	6.96528	19.7361	182.725	5.89581	4.17114	23.0133	6.33085	2.6624	0.00394603	0.0236684	up	yes
Up or down regulated glucanase in Zi330 under deep sowing stress
gene_id	gene_name	transcript_id	GO	KEGG	KO_ENTRY	EC	Description	trans_type	FPKM.ZDS1	FPKM.ZDS2	FPKM.ZDS3	FPKM.ZCK1	FPKM.ZCK2	FPKM.ZCK3	fc	log2(fc)	pval	qval	regulation	significant
Zm00001d034015	exoglucanase1	Zm00001d034015_T001;Zm00001d034015_T002;Zm00001d034015_T003;Zm00001d034015_T005;Zm00001d034015_T004	GO:0004553(hydrolase activity, hydrolyzing O-glycosyl compounds);GO:0005975(carbohydrate metabolic process);GO:0008422(beta-glucosidase activity);GO:0009251(glucan catabolic process);GO:0016787(hydrolase activity);GO:0016787(hydrolase activity)	00460(Cyanoamino acid metabolism);00500(Starch and sucrose metabolism);00940(Phenylpropanoid biosynthesis);00940(Phenylpropanoid biosynthesis)	K05349	EC:3.2.1.21	exoglucanase1	protein_coding	67.5776	26.5926	47.8557	9.70592	10.0382	19.9101	3.58161	1.84061	3.75331e-05	0.0010805	up	yes
Zm00001d010446	Zm00001d010446	Zm00001d010446_T001	GO:0000272(polysaccharide catabolic process);GO:0003824(catalytic activity);GO:0004553(hydrolase activity, hydrolyzing O-glycosyl compounds);GO:0005975(carbohydrate metabolic process);GO:0008152(metabolic process);GO:0008810(cellulase activity);GO:0016787(hydrolase activity);GO:0016798(hydrolase activity, acting on glycosyl bonds);GO:0030245(cellulose catabolic process);GO:0030246(carbohydrate bi…	00500(Starch and sucrose metabolism)	K01179	EC:3.2.1.4	Endoglucanase 6	protein_coding	3.168	0.064133	3.24572	0.0001	0.0001	0.07648	84.4791	6.40052	3.85069e-05	0.00110162	up	yes
Zm00001d047538	Zm00001d047538	Zm00001d047538_T003;Zm00001d047538_T005;Zm00001d047538_T004;Zm00001d047538_T001;Zm00001d047538_T006;Zm00001d047538_T002	GO:0000272(polysaccharide catabolic process);GO:0003824(catalytic activity);GO:0004553(hydrolase activity, hydrolyzing O-glycosyl compounds);GO:0005975(carbohydrate metabolic process);GO:0008152(metabolic process);GO:0008810(cellulase activity);GO:0016020(membrane);GO:0016021(integral component of membrane);GO:0016787(hydrolase activity);GO:0016798(hydrolase activity, acting on glycosyl bonds);GO…	00500(Starch and sucrose metabolism);00500(Starch and sucrose metabolism)	K01179	EC:3.2.1.4	Endo-1%2C4-beta-glucanase	protein_coding	2.28407	1.12186	2.07516	0.475873	0.251426	0.512508	4.42093	2.14435	0.000654991	0.011507	up	yes
Zm00001d009097	Zm00001d009097	Zm00001d009097_T001	GO:0000272(polysaccharide catabolic process);GO:0003824(catalytic activity);GO:0004553(hydrolase activity, hydrolyzing O-glycosyl compounds);GO:0005975(carbohydrate metabolic process);GO:0008152(metabolic process);GO:0008810(cellulase activity);GO:0016020(membrane);GO:0016021(integral component of membrane);GO:0016787(hydrolase activity);GO:0016798(hydrolase activity, acting on glycosyl bonds);GO…	NA	NA	NA	Endoglucanase 1	protein_coding	3.23871	0.0001	6.29103	0.155232	0.0001	0.667175	11.5863	3.53435	0.0298724	0.200341	up	yes
Up or down regulated glucanase in Zi330 after GA treatment under deep sowing stress
gene_id	gene_name	transcript_id	GO	KEGG	KO_ENTRY	EC	Description	trans_type	FPKM.ZDS1	FPKM.ZDS2	FPKM.ZDS3	FPKM.ZCK1	FPKM.ZCK2	FPKM.ZCK3	fc	log2(fc)	pval	qval	regulation	significant
Zm00001d009097	Zm00001d009097	Zm00001d009097_T001	GO:0000272(polysaccharide catabolic process);GO:0003824(catalytic activity);GO:0004553(hydrolase activity, hydrolyzing O-glycosyl compounds);GO:0005975(carbohydrate metabolic process);GO:0008152(metabolic process);GO:0008810(cellulase activity);GO:0016020(membrane);GO:0016021(integral component of membrane);GO:0016787(hydrolase activity);GO:0016798(hydrolase activity, acting on glycosyl bonds);GO…	NA	NA	NA	Endoglucanase 1	protein_coding	14.1205	15.2152	3.44983	0.0001	0.0001	0.0001	109285	16.7377	1.31025e-22	7.67347e-19	up	yes
Zm00001d037338	Zm00001d037338	Zm00001d037338_T001;Zm00001d037338_T002	GO:0000272(polysaccharide catabolic process);GO:0003824(catalytic activity);GO:0004553(hydrolase activity, hydrolyzing O-glycosyl compounds);GO:0005975(carbohydrate metabolic process);GO:0008152(metabolic process);GO:0008810(cellulase activity);GO:0016787(hydrolase activity);GO:0016798(hydrolase activity, acting on glycosyl bonds);GO:0030245(cellulose catabolic process);GO:0030245(cellulose catab…	00500(Starch and sucrose metabolism);00500(Starch and sucrose metabolism)	K01179	EC:3.2.1.4	Endoglucanase 8	protein_coding	2.09258	1.1076	2.10359	0.0001	0.0001	0.0001	17679.3	14.1098	1.18576e-10	2.80583e-08	up	yes
Zm00001d010446	Zm00001d010446	Zm00001d010446_T001	GO:0000272(polysaccharide catabolic process);GO:0003824(catalytic activity);GO:0004553(hydrolase activity, hydrolyzing O-glycosyl compounds);GO:0005975(carbohydrate metabolic process);GO:0008152(metabolic process);GO:0008810(cellulase activity);GO:0016787(hydrolase activity);GO:0016798(hydrolase activity, acting on glycosyl bonds);GO:0030245(cellulose catabolic process);GO:0030246(carbohydrate bi…	00500(Starch and sucrose metabolism)	K01179	EC:3.2.1.4	Endoglucanase 6	protein_coding	8.71444	10.7913	0.176984	0.0001	0.060629	0.0001	323.574	8.33795	1.88884e-07	1.36148e-05	up	yes
Zm00001d035082	Zm00001d035082	Zm00001d035082_T001	GO:0000272(polysaccharide catabolic process);GO:0003824(catalytic activity);GO:0004553(hydrolase activity, hydrolyzing O-glycosyl compounds);GO:0005975(carbohydrate metabolic process);GO:0008152(metabolic process);GO:0008810(cellulase activity);GO:0016787(hydrolase activity);GO:0016798(hydrolase activity, acting on glycosyl bonds);GO:0030245(cellulose catabolic process)	NA	NA	NA	Endoglucanase 1	protein_coding	2.6932	0.660703	0.135187	0.0001	0.0001	0.0001	11630.3	13.5056	2.50713e-06	0.000114213	up	yes
Zm00001d044744	Zm00001d044744	Zm00001d044744_T001	GO:0000272(polysaccharide catabolic process);GO:0003824(catalytic activity);GO:0004553(hydrolase activity, hydrolyzing O-glycosyl compounds);GO:0005975(carbohydrate metabolic process);GO:0008152(metabolic process);GO:0008810(cellulase activity);GO:0016787(hydrolase activity);GO:0016798(hydrolase activity, acting on glycosyl bonds);GO:0030245(cellulose catabolic process)	NA	NA	NA	Endoglucanase 11	protein_coding	16.2396	26.7194	17.0192	7.76625	6.90691	3.07626	3.37916	1.75667	0.000731533	0.0124723	up	yes
Zm00001d021304	Zm00001d021304	Zm00001d021304_T001	GO:0000272(polysaccharide catabolic process);GO:0003824(catalytic activity);GO:0004553(hydrolase activity, hydrolyzing O-glycosyl compounds);GO:0005975(carbohydrate metabolic process);GO:0008152(metabolic process);GO:0008810(cellulase activity);GO:0016020(membrane);GO:0016021(integral component of membrane);GO:0016787(hydrolase activity);GO:0016798(hydrolase activity, acting on glycosyl bonds);GO…	NA	NA	NA	Endoglucanase 2	protein_coding	35.0165	38.3994	24.7742	17.0445	10.923	13.844	2.3484	1.23168	0.00565956	0.0622738	up	yes
Zm00001d017949	Zm00001d017949	Zm00001d017949_T001	GO:0000272(polysaccharide catabolic process);GO:0003824(catalytic activity);GO:0004553(hydrolase activity, hydrolyzing O-glycosyl compounds);GO:0005975(carbohydrate metabolic process);GO:0008152(metabolic process);GO:0008810(cellulase activity);GO:0016787(hydrolase activity);GO:0016798(hydrolase activity, acting on glycosyl bonds);GO:0030245(cellulose catabolic process)	NA	NA	NA	Endoglucanase 8	protein_coding	1.40679	0.0001	0.580323	0.100096	0.0001	0.032361	14.9914	3.90606	0.0273905	0.201586	up	yes
