# Supplementary material for: Network Analysis of Different Exogenous Hormones on the Regulation of Deep Sowing Tolerance in Maize Seedlings
Source: Front Plant Sci. 2021 Dec 2;12:739101. doi: 10.3389/fpls.2021.739101 (PMC8674439; doi:10.3389/fpls.2021.739101)
Supplement: Supplementary file 8 [file Table_7.XLSX]

## Sheet: Sheet1
Coexpressed DEGs involved in lignin synthesis in two inbred lines under deep sowing stress
GO_ID	GO_Term	GO_function	Gene_ID	Gene_name	Description	log2(fc).QDS VS QCK	regulation (QDS VS QCK)	log2(fc).ZDS VS ZCK	regulation (ZDS VS ZCK)
GO:0009809	lignin biosynthetic process	biological_process	Zm00001d004443	Zm00001d004443	Probable cinnamyl alcohol dehydrogenase 9	-4.10992	down	-1.71896	down
GO:0009809	lignin biosynthetic process	biological_process	Zm00001d024314	Zm00001d024314	Putative cinnamyl-alcohol dehydrogenase family protein	-3.45708	down	-3.11546	down
GO:0009809	lignin biosynthetic process	biological_process	Zm00001d032152	cinnamoyl CoA reductase1	cinnamoyl CoA reductase1	-1.53625	down	-1.07462	down
GO:0009809	lignin biosynthetic process	biological_process	Zm00001d043174	GRMZM2G138074	Cytochrome P450 98A3	-1.83472	down	-1.50827	down
GO:0009809	lignin biosynthetic process	biological_process	Zm00001d051938	Zm00001d051938	Cinnamoyl-CoA reductase 1	-1.37147	down	-2.53644	down
GO:1901430	positive regulation of syringal lignin biosynthetic process	biological_process	Zm00001d024630	MYB-transcription factor 92	Putative MYB DNA-binding domain superfamily protein	-2.06786	down	4.51599	up
DEGs involved in lignin synthesis in Q319 under the condition of exogenous GA alleviating deep sowing stress
GO_ID	GO_Term	GO_function	GO_class	pvalue	Gene_ID	Gene_name	Description	log2(fc)	regulation
GO:0009809	lignin biosynthetic process	biological_process	8	8.23323e-07	Zm00001d004443	Zm00001d004443	Probable cinnamyl alcohol dehydrogenase 9	-5.54153	down
GO:0009809	lignin biosynthetic process	biological_process	8	8.23323e-07	Zm00001d013862	Zm00001d013862	Cytochrome P450 84A1	-2.33201	down
GO:0009809	lignin biosynthetic process	biological_process	8	8.23323e-07	Zm00001d015618	brown midrib1	Probable cinnamyl alcohol dehydrogenase	-2.34273	down
GO:0009809	lignin biosynthetic process	biological_process	8	8.23323e-07	Zm00001d032152	cinnamoyl CoA reductase1	cinnamoyl CoA reductase1	-1.64955	down
GO:0009809	lignin biosynthetic process	biological_process	8	8.23323e-07	Zm00001d032467	AC210173.4_FG005	Cytochrome P450 84A1	-2.31795	down
GO:0009809	lignin biosynthetic process	biological_process	8	8.23323e-07	Zm00001d032468	Zm00001d032468	Cytochrome P450 CYP84A33v1	-2.19172	down
GO:0009809	lignin biosynthetic process	biological_process	8	8.23323e-07	Zm00001d038555	Zm00001d038555	Cytochrome P450 98A3	-1.26615	down
GO:0009809	lignin biosynthetic process	biological_process	8	8.23323e-07	Zm00001d045206	Caffeoyl CoA O-methyltransferase2	Caffeoyl CoA O-methyltransferase2	-2.21733	down
GO:0009809	lignin biosynthetic process	biological_process	8	8.23323e-07	Zm00001d049541	brown midrib3	Flavone 3'-O-methyltransferase 1	-1.49015	down
DEGs involved in lignin synthesis in Zi330 under the condition of exogenous GA alleviating deep sowing stress
GO_ID	GO_Term	GO_function	GO_class	pvalue	Gene_ID	Gene_name	Description	log2(fc)	regulation
GO:0009809	lignin biosynthetic process	biological_process	8	0.590277	Zm00001d024314	Zm00001d024314	Putative cinnamyl-alcohol dehydrogenase family protein	-2.12466	down
GO:0009809	lignin biosynthetic process	biological_process	8	0.590277	Zm00001d043174	GRMZM2G138074	Cytochrome P450 98A3	-1.79802	down
DEGs involved in lignin synthesis in Q319 under the condition of exogenous BR alleviating deep sowing stress
GO_ID	GO_Term	GO_function	GO_class	pvalue	Gene_ID	Gene_name	Description	log2(fc)	regulation
GO:0009809	lignin biosynthetic process	biological_process	8	0.220283	Zm00001d013862	Zm00001d013862	Cytochrome P450 84A1	-1.41818	down
GO:0009809	lignin biosynthetic process	biological_process	8	0.220283	Zm00001d024314	Zm00001d024314	Putative cinnamyl-alcohol dehydrogenase family protein	-2.98364	down
GO:0009809	lignin biosynthetic process	biological_process	8	0.220283	Zm00001d051938	Zm00001d051938	Cinnamoyl-CoA reductase 1	2.22493	up
DEGs involved in lignin synthesis in Zi330 under the condition of exogenous BR alleviating deep sowing stress
GO_ID	GO_Term	GO_function	GO_class	pvalue	Gene_ID	Gene_name	Description	log2(fc)	regulation
GO:0009809	lignin biosynthetic process	biological_process	8	9.77938e-15	Zm00001d002346	cinnamyl alcohol dehydrogenase1	cinnamyl alcohol dehydrogenase1	13.5659	up
GO:0009809	lignin biosynthetic process	biological_process	8	9.77938e-15	Zm00001d004443	Zm00001d004443	Probable cinnamyl alcohol dehydrogenase 9	-3.9807	down
GO:0009809	lignin biosynthetic process	biological_process	8	9.77938e-15	Zm00001d013862	Zm00001d013862	Cytochrome P450 84A1	-3.61665	down
GO:0009809	lignin biosynthetic process	biological_process	8	9.77938e-15	Zm00001d015618	brown midrib1	Probable cinnamyl alcohol dehydrogenase	-2.07023	down
GO:0009809	lignin biosynthetic process	biological_process	8	9.77938e-15	Zm00001d020400	Zm00001d020400	Probable cinnamyl alcohol dehydrogenase 6	-4.70645	down
GO:0009809	lignin biosynthetic process	biological_process	8	9.77938e-15	Zm00001d024314	Zm00001d024314	Putative cinnamyl-alcohol dehydrogenase family protein	-4.10005	down
GO:0009809	lignin biosynthetic process	biological_process	8	9.77938e-15	Zm00001d032152	cinnamoyl CoA reductase1	cinnamoyl CoA reductase1	-1.59279	down
GO:0009809	lignin biosynthetic process	biological_process	8	9.77938e-15	Zm00001d032467	AC210173.4_FG005	Cytochrome P450 84A1	-1.47067	down
GO:0009809	lignin biosynthetic process	biological_process	8	9.77938e-15	Zm00001d032468	Zm00001d032468	Cytochrome P450 CYP84A33v1	-1.33933	down
GO:0009809	lignin biosynthetic process	biological_process	8	9.77938e-15	Zm00001d038555	Zm00001d038555	Cytochrome P450 98A3	-1.03492	down
GO:0009809	lignin biosynthetic process	biological_process	8	9.77938e-15	Zm00001d043174	GRMZM2G138074	Cytochrome P450 98A3	-1.58027	down
GO:0009809	lignin biosynthetic process	biological_process	8	9.77938e-15	Zm00001d045043	Zm00001d045043	Probable cinnamyl alcohol dehydrogenase 1	-1.86007	down
GO:0009809	lignin biosynthetic process	biological_process	8	9.77938e-15	Zm00001d045206	Caffeoyl CoA O-methyltransferase2	Caffeoyl CoA O-methyltransferase2	-1.08021	down
GO:0009809	lignin biosynthetic process	biological_process	8	9.77938e-15	Zm00001d049541	brown midrib3	Flavone 3'-O-methyltransferase 1	-1.09489	down
GO:0009809	lignin biosynthetic process	biological_process	8	9.77938e-15	Zm00001d051938	Zm00001d051938	Cinnamoyl-CoA reductase 1	-2.73417	down
DEGs involved in lignin synthesis in Qi319 under the condition of exogenous SL alleviating deep sowing stress
GO_ID	GO_Term	GO_function	GO_class	pvalue	Gene_ID	Gene_name	Description	log2(fc)	regulation
GO:0009809	lignin biosynthetic process	biological_process	8	0.0140231	Zm00001d004443	Zm00001d004443	Probable cinnamyl alcohol dehydrogenase 9	-5.82823	down
GO:0009809	lignin biosynthetic process	biological_process	8	0.0140231	Zm00001d013862	Zm00001d013862	Cytochrome P450 84A1	-1.28645	down
GO:0009809	lignin biosynthetic process	biological_process	8	0.0140231	Zm00001d015618	brown midrib1	Probable cinnamyl alcohol dehydrogenase	-1.16569	down
GO:0009809	lignin biosynthetic process	biological_process	8	0.0140231	Zm00001d020400	Zm00001d020400	Probable cinnamyl alcohol dehydrogenase 6	3.06144	up
GO:0009809	lignin biosynthetic process	biological_process	8	0.0140231	Zm00001d024314	Zm00001d024314	Putative cinnamyl-alcohol dehydrogenase family protein	-5.75369	down
GO:0009809	lignin biosynthetic process	biological_process	8	0.0140231	Zm00001d043174	GRMZM2G138074	Cytochrome P450 98A3	-1.74988	down
GO:0009809	lignin biosynthetic process	biological_process	8	0.0140231	Zm00001d045206	Caffeoyl CoA O-methyltransferase2	Caffeoyl CoA O-methyltransferase2	-1.28778	down
DEGs involved in lignin synthesis in Zi330 under the condition of exogenous SL alleviating deep sowing stress
GO_ID	GO_Term	GO_function	GO_class	pvalue	Gene_ID	Gene_name	Description	log2(fc)	regulation
GO:0009809	lignin biosynthetic process	biological_process	8	8.97197e-05	Zm00001d020400	Zm00001d020400	Probable cinnamyl alcohol dehydrogenase 6	3.21211	up
GO:0009809	lignin biosynthetic process	biological_process	8	8.97197e-05	Zm00001d032467	AC210173.4_FG005	Cytochrome P450 84A1	1.69436	up
GO:0009809	lignin biosynthetic process	biological_process	8	8.97197e-05	Zm00001d032468	Zm00001d032468	Cytochrome P450 CYP84A33v1	1.06537	up
GO:0009809	lignin biosynthetic process	biological_process	8	8.97197e-05	Zm00001d036293	Caffeoyl-CoA O-methyltransferase1	Caffeoyl-CoA O-methyltransferase1	1.1381	up
GO:0009809	lignin biosynthetic process	biological_process	8	8.97197e-05	Zm00001d038555	Zm00001d038555	Cytochrome P450 98A3	1.11191	up
GO:0009809	lignin biosynthetic process	biological_process	8	8.97197e-05	Zm00001d045043	Zm00001d045043	Probable cinnamyl alcohol dehydrogenase 1	1.07058	up
GO:0009809	lignin biosynthetic process	biological_process	8	8.97197e-05	Zm00001d045206	Caffeoyl CoA O-methyltransferase2	Caffeoyl CoA O-methyltransferase2	1.28085	up
GO:0009809	lignin biosynthetic process	biological_process	8	8.97197e-05	Zm00001d051938	Zm00001d051938	Cinnamoyl-CoA reductase 1	4.16648	up
