# Supplementary material for: Network Analysis of Different Exogenous Hormones on the Regulation of Deep Sowing Tolerance in Maize Seedlings
Source: Front Plant Sci. 2021 Dec 2;12:739101. doi: 10.3389/fpls.2021.739101 (PMC8674439; doi:10.3389/fpls.2021.739101)
Supplement: Supplementary file 9 [file Table_8.XLSX]

## Sheet: Sheet1
Expression of endochitinase in both inbred lines under deep sowing stress
Gene_ID	Description	regulation (QDS VS QCK)		Gene_ID	Description	regulation (ZDS VS ZCK)
Zm00001d018966	Acidic endochitinase	up		Zm00001d029794	Basic endochitinase B	down
Zm00001d010911	Basic endochitinase B	up		Zm00001d027525	Basic endochitinase B	down
Zm00001d003190	Endochitinase A	up		Zm00001d027524	Basic endochitinase B	down
Zm00001d027525	Basic endochitinase B	down		Zm00001d009936	Basic endochitinase A	down
Zm00001d048903	Acidic endochitinase	down		Zm00001d008199	Basic endochitinase B	down
Zm00001d017152	endochitinase precursor4	up		Zm00001d049727	Acidic endochitinase	down
Zm00001d009936	Basic endochitinase A	up		Zm00001d017152	endochitinase precursor4	down
Zm00001d049727	Acidic endochitinase	up		Zm00001d014842	Basic endochitinase B	down
Expression of endochitinase in both inbred lines under GA treatment
Gene_ID	Description	regulation (QDSGA VS QCKGA)		Gene_ID	Description	regulation (ZDSGA VS ZCKGA)
Zm00001d042770	Acidic endochitinase	up		Zm00001d027525	Basic endochitinase B	down
Zm00001d027525	Basic endochitinase B	up		Zm00001d027524	Basic endochitinase B	down
Zm00001d018966	Acidic endochitinase	up
Zm00001d003190	Endochitinase A	up
Expression of endochitinase in both inbred lines under BR treatment
Gene_ID	Description	regulation (QDSBR VS QCKBR)		Gene_ID	Description	regulation (ZDSBR VS ZCKBR)
Zm00001d003190	Endochitinase A	up		Zm00001d049727	Acidic endochitinase	down
Zm00001d018966	Acidic endochitinase	up		Zm00001d009936	Basic endochitinase A	down
Zm00001d048903	Acidic endochitinase	up		Zm00001d017152	endochitinase precursor4	down
Zm00001d017152	endochitinase precursor4	up		Zm00001d029794	Basic endochitinase B	down
Expression of endochitinase in both inbred lines under SL treatment
Gene_ID	Description	regulation (QDSSL VS QCKSL)		Gene_ID	Description	regulation (ZDSSL VS ZCKSL)
Zm00001d042770	Acidic endochitinase			Zm00001d027525	Basic endochitinase B
Zm00001d003190	Endochitinase A			Zm00001d027524	Basic endochitinase B
Zm00001d018966	Acidic endochitinase
Zm00001d049727	Acidic endochitinase
