# Supplementary material for: Network Analysis of Different Exogenous Hormones on the Regulation of Deep Sowing Tolerance in Maize Seedlings
Source: Front Plant Sci. 2021 Dec 2;12:739101. doi: 10.3389/fpls.2021.739101 (PMC8674439; doi:10.3389/fpls.2021.739101)
Supplement: Supplementary file 10 [file Table_9.XLSX]

## Sheet: Sheet1
Table S9 Up-regulated protein kinase in both inbred lines under different treatments
gene_id	Description	regulation (QDS VS QCK)	gene_id	Description	regulation (ZDS VS ZCK)		gene_id	Description	regulation (QDSGA VS QCKGA)	gene_id	Description	regulation (ZDSGA VS ZCKGA)		gene_id	Description	regulation (QDSBR VS QCKBR)	gene_id	Description	regulation (ZDSBR VS ZCKBR )		gene_id	Description	regulation (QDSSL VS QCKSL)	gene_id	Description	regulation (ZDSSL VS ZCKSL )
Zm00001d036972	Putative leucine-rich repeat receptor-like protein kinase family protein	up	Zm00001d008715	Putative leucine-rich repeat receptor protein kinase family protein	up		Zm00001d036972	Putative leucine-rich repeat receptor-like protein kinase family protein	up	Zm00001d008715	Putative leucine-rich repeat receptor protein kinase family protein	up		Zm00001d052835	Putative leucine-rich repeat receptor protein kinase family protein	up	Zm00001d020461	Ankyrin protein kinase-like	up		Zm00001d002835	Probable LRR receptor-like serine/threonine-protein kinase	up	Zm00001d037672	Putative leucine-rich repeat receptor protein kinase family protein	up
Zm00001d052340	CBL-interacting serine/threonine-protein kinase 10	up	Zm00001d010178	Protein kinase superfamily protein	up		Zm00001d052340	CBL-interacting serine/threonine-protein kinase 10	up	Zm00001d010178	Protein kinase superfamily protein	up		Zm00001d046643	Protein kinase superfamily protein	up	Zm00001d045088	Putative leucine-rich repeat receptor-like protein kinase family protein	up		Zm00001d043202	Serine/threonine-protein kinase WNK (With No Lysine)-related	up	Zm00001d008715	Putative leucine-rich repeat receptor protein kinase family protein	up
Zm00001d020461	Ankyrin protein kinase-like	up	Zm00001d042051	Probably inactive leucine-rich repeat receptor-like protein kinase	up		Zm00001d020461	Ankyrin protein kinase-like	up	Zm00001d042051	Probably inactive leucine-rich repeat receptor-like protein kinase	up		Zm00001d038884	Putative MAPKKK family protein kinase	up	Zm00001d002835	Probable LRR receptor-like serine/threonine-protein kinase	up		Zm00001d036972	Putative leucine-rich repeat receptor-like protein kinase family protein	up	Zm00001d043740	Mitogen-activated protein kinase kinase kinase YODA	up
Zm00001d037783	Putative receptor protein kinase ZmPK1	up	Zm00001d014971	Leucine-rich repeat receptor-like protein kinase PXL1	up		Zm00001d037783	Putative receptor protein kinase ZmPK1	up	Zm00001d014971	Leucine-rich repeat receptor-like protein kinase PXL1	up		Zm00001d043252	Serine/threonine-protein kinase	up	Zm00001d015032	Serine/threonine-protein kinase STY46	up		Zm00001d037783	Putative receptor protein kinase ZmPK1	up	Zm00001d031785	receptor-like protein kinase 4	up
Zm00001d016783	stress-induced protein kinase1	up	Zm00001d048390	Putative leucine-rich repeat receptor-like protein kinase family protein	up		Zm00001d016783	stress-induced protein kinase1	up	Zm00001d048390	Putative leucine-rich repeat receptor-like protein kinase family protein	up		Zm00001d021682	Cysteine-rich receptor-like protein kinase 25	up	Zm00001d002287	LRR receptor-like serine/threonine-protein kinase FLS2	up		Zm00001d002168	Receptor-like serine/threonine-protein kinase SD1-8	up	Zm00001d026126	Probable serine/threonine-protein kinase Cx32 chloroplastic	up
Zm00001d007789	receptor-like protein kinase 4	up	Zm00001d009710	Putative DUF1221-domain containing protein kinase family protein	up		Zm00001d007789	receptor-like protein kinase 4	up	Zm00001d009710	Putative DUF1221-domain containing protein kinase family protein	up		Zm00001d003101	Probable leucine-rich repeat receptor-like protein kinase	up	Zm00001d036972	Putative leucine-rich repeat receptor-like protein kinase family protein	up		Zm00001d006535	Cysteine-rich receptor-like protein kinase 10	up	Zm00001d002905	Protein kinase superfamily protein	up
Zm00001d006793	Cysteine-rich receptor-like protein kinase 10	up	Zm00001d037672	Putative leucine-rich repeat receptor protein kinase family protein	up		Zm00001d006793	Cysteine-rich receptor-like protein kinase 10	up	Zm00001d037672	Putative leucine-rich repeat receptor protein kinase family protein	up		Zm00001d006420	LRR receptor-like serine/threonine-protein kinase GSO1	up	Zm00001d045086	Putative leucine-rich repeat receptor-like protein kinase family protein	up		Zm00001d005986	Probable LRR receptor-like serine/threonine-protein kinase	up	Zm00001d025002	Putative leucine-rich repeat receptor protein kinase family protein	up
Zm00001d038883	Mitogen-activated protein kinase kinase kinase YODA	up	Zm00001d028319	Probable receptor-like serine/threonine-protein kinase	up		Zm00001d038883	Mitogen-activated protein kinase kinase kinase YODA	up	Zm00001d028319	Probable receptor-like serine/threonine-protein kinase	up		Zm00001d040324	Serine/threonine-protein kinase-like protein	up	Zm00001d034240	Leucine-rich repeat receptor-like serine/threonine-protein kinase BAM3	up		Zm00001d018799	CBL-interacting serine/threonine-protein kinase 23	up	Zm00001d020429	Protein kinase superfamily protein	up
Zm00001d002835	Probable LRR receptor-like serine/threonine-protein kinase	up	Zm00001d043058	Probable LRR receptor-like serine/threonine-protein kinase IRK	up		Zm00001d002835	Probable LRR receptor-like serine/threonine-protein kinase	up	Zm00001d043058	Probable LRR receptor-like serine/threonine-protein kinase IRK	up		Zm00001d025997	Protein kinase superfamily protein	up	Zm00001d043202	Serine/threonine-protein kinase WNK (With No Lysine)-related	up		Zm00001d037666	LRR receptor-like serine/threonine-protein kinase GSO1	up	Zm00001d011656	Putative MAPKKK family protein kinase	up
Zm00001d051125	LRR receptor-like serine/threonine-protein kinase EFR	up	Zm00001d002905	Protein kinase superfamily protein	up		Zm00001d051125	LRR receptor-like serine/threonine-protein kinase EFR	up	Zm00001d002905	Protein kinase superfamily protein	up		Zm00001d004866	Protein kinase family protein	up	Zm00001d034166	Serine/threonine-protein kinase Aurora-3	up		Zm00001d021684	Cysteine-rich receptor-like protein kinase 25	up	Zm00001d011625	Putative WAK receptor-like protein kinase family protein	up
Zm00001d035479	Putative WAK family receptor-like protein kinase	up	Zm00001d004929	Leucine-rich repeat receptor-like protein kinase PXC1	up		Zm00001d035479	Putative WAK family receptor-like protein kinase	up	Zm00001d004929	Leucine-rich repeat receptor-like protein kinase PXC1	up		Zm00001d020862	Probable LRR receptor-like serine/threonine-protein kinase	up	Zm00001d037666	LRR receptor-like serine/threonine-protein kinase GSO1	up		Zm00001d041773	Leucine-rich repeat protein kinase family protein	up	Zm00001d002599	Probable LRR receptor-like serine/threonine-protein kinase	up
Zm00001d008462	Cysteine-rich receptor-like protein kinase 37	up	Zm00001d004635	Leucine-rich repeat protein kinase family protein	up		Zm00001d008462	Cysteine-rich receptor-like protein kinase 37	up	Zm00001d004635	Leucine-rich repeat protein kinase family protein	up		Zm00001d046838	Putative receptor-like protein kinase family protein	up	Zm00001d037783	Putative receptor protein kinase ZmPK1	up		Zm00001d002287	LRR receptor-like serine/threonine-protein kinase FLS2	up	Zm00001d021948	Probable serine/threonine-protein kinase WNK11	up
Zm00001d002287	LRR receptor-like serine/threonine-protein kinase FLS2	up	Zm00001d046485	Putative leucine-rich repeat receptor protein kinase family protein	up		Zm00001d002287	LRR receptor-like serine/threonine-protein kinase FLS2	up	Zm00001d046485	Putative leucine-rich repeat receptor protein kinase family protein	up		Zm00001d045124	Protein kinase superfamily protein with octicosapeptide/Phox/Bem1p domain	up	Zm00001d046838	Putative receptor-like protein kinase family protein	up		Zm00001d040094	G-type lectin S-receptor-like serine/threonine-protein kinase SD2-5	up	Zm00001d022549	Protein kinase 2B chloroplastic	up
Zm00001d042637	Leucine-rich receptor-like protein kinase family protein	up	Zm00001d037898	Protein kinase superfamily protein	up		Zm00001d042637	Leucine-rich receptor-like protein kinase family protein	up	Zm00001d037898	Protein kinase superfamily protein	up		Zm00001d041941	Leucine-rich repeat protein kinase family protein	up	Zm00001d038487	Putative leucine-rich repeat receptor-like protein kinase family protein	up		Zm00001d014583	Protein kinase superfamily protein	up	Zm00001d039406	Receptor-like protein kinase	up
Zm00001d008633	Putative leucine-rich repeat receptor-like protein kinase family protein	up	Zm00001d024199	Probable receptor-like serine/threonine-protein kinase	up		Zm00001d008633	Putative leucine-rich repeat receptor-like protein kinase family protein	up	Zm00001d024199	Probable receptor-like serine/threonine-protein kinase	up		Zm00001d042847	Protein kinase	up	Zm00001d018789	Probable receptor-like protein kinase	up		Zm00001d037397	Putative lectin-like receptor protein kinase family protein	up	Zm00001d034372	Calcium-dependent protein kinase 1	up
Zm00001d045088	Putative leucine-rich repeat receptor-like protein kinase family protein	up	Zm00001d028317	Leucine-rich repeat receptor-like serine/threonine-protein kinase BAM3	up		Zm00001d045088	Putative leucine-rich repeat receptor-like protein kinase family protein	up	Zm00001d028317	Leucine-rich repeat receptor-like serine/threonine-protein kinase BAM3	up		Zm00001d033339	Serine/threonine-protein kinase SRK2E	up	Zm00001d015884	Protein kinase	up		Zm00001d020461	Ankyrin protein kinase-like	up	Zm00001d043959	Protein kinase superfamily protein	up
Zm00001d010700	G-type lectin S-receptor-like serine/threonine-protein kinase B120	up	Zm00001d031427	Leucine-rich repeat receptor-like protein kinase PEPR1	up		Zm00001d010700	G-type lectin S-receptor-like serine/threonine-protein kinase B120	up	Zm00001d031427	Leucine-rich repeat receptor-like protein kinase PEPR1	up		Zm00001d025002	Putative leucine-rich repeat receptor protein kinase family protein	up	Zm00001d046178	Putative leucine-rich repeat protein kinase family protein	up		Zm00001d006536	Cysteine-rich receptor-like protein kinase 10	up	Zm00001d020955	WAK80-OsWAK receptor-like protein kinase	up
Zm00001d035133	LRR receptor-like serine/threonine-protein kinase GSO2	up	Zm00001d024047	Leucine-rich repeat protein kinase family protein	up		Zm00001d035133	LRR receptor-like serine/threonine-protein kinase GSO2	up	Zm00001d024047	Leucine-rich repeat protein kinase family protein	up		Zm00001d029948	Serine/threonine-protein kinase D6PKL1	up	Zm00001d021692	Cysteine-rich receptor-like protein kinase 10	up		Zm00001d021688	Cysteine-rich receptor-like protein kinase 10	up	Zm00001d011643	Putative leucine-rich repeat receptor-like protein kinase family protein	up
Zm00001d025997	Protein kinase superfamily protein	up	Zm00001d052376	protein kinase homolog2	up		Zm00001d025997	Protein kinase superfamily protein	up	Zm00001d052376	protein kinase homolog2	up		Zm00001d039654	Protein kinase PINOID 2	up	Zm00001d053876	Protein kinase protein with adenine nucleotide alpha hydrolases-like domain	up		Zm00001d037672	Putative leucine-rich repeat receptor protein kinase family protein	up	Zm00001d013109	calcium-dependent protein kinase 10	up
Zm00001d002198	Receptor-like serine/threonine-protein kinase SD1-8	up	Zm00001d039967	Probable leucine-rich repeat receptor-like protein kinase	up		Zm00001d002198	Receptor-like serine/threonine-protein kinase SD1-8	up	Zm00001d039967	Probable leucine-rich repeat receptor-like protein kinase	up		Zm00001d006267	Serine/threonine-protein kinase STY46	up	Zm00001d037672	Putative leucine-rich repeat receptor protein kinase family protein	up		Zm00001d052835	Putative leucine-rich repeat receptor protein kinase family protein	up	Zm00001d032408	G-type lectin S-receptor-like serine/threonine-protein kinase B120	up
Zm00001d008966	Serine/threonine-protein kinase	up	Zm00001d052835	Putative leucine-rich repeat receptor protein kinase family protein	up		Zm00001d008966	Serine/threonine-protein kinase	up	Zm00001d052835	Putative leucine-rich repeat receptor protein kinase family protein	up		Zm00001d037672	Putative leucine-rich repeat receptor protein kinase family protein	up	Zm00001d028337	Proline-rich receptor-like protein kinase PERK4	up		Zm00001d038883	Mitogen-activated protein kinase kinase kinase YODA	up	Zm00001d021698	Receptor-like protein kinase RK20-1	up
Zm00001d021684	Cysteine-rich receptor-like protein kinase 25	up	Zm00001d046838	Putative receptor-like protein kinase family protein	up		Zm00001d021684	Cysteine-rich receptor-like protein kinase 25	up	Zm00001d046838	Putative receptor-like protein kinase family protein	up		Zm00001d029075	CBL-interacting serine/threonine-protein kinase 10	up	Zm00001d052340	CBL-interacting serine/threonine-protein kinase 10	up		Zm00001d005696	NPK1-related protein kinase 2	up	Zm00001d013572	Cysteine-rich receptor-like protein kinase 10	up
Zm00001d021692	Cysteine-rich receptor-like protein kinase 10	up	Zm00001d018935	Serine/threonine-protein kinase Nek1	up		Zm00001d021692	Cysteine-rich receptor-like protein kinase 10	up	Zm00001d018935	Serine/threonine-protein kinase Nek1	up		Zm00001d019145	Leucine-rich repeat receptor-like tyrosine-protein kinase PXC3	up	Zm00001d049588	Putative leucine-rich repeat receptor-like protein kinase family protein	up		Zm00001d003659	Serine/threonine-protein kinase SRK2A	up	Zm00001d052906	Putative lectin-domain receptor-like protein kinase family protein	up
Zm00001d044806	Serine/threonine-protein kinase WNK (With No Lysine)-related	up	Zm00001d002599	Probable LRR receptor-like serine/threonine-protein kinase	up		Zm00001d044806	Serine/threonine-protein kinase WNK (With No Lysine)-related	up	Zm00001d002599	Probable LRR receptor-like serine/threonine-protein kinase	up		Zm00001d036771	Protein kinase superfamily protein	up	Zm00001d034689	TPR-containing protein kinase	up		Zm00001d045088	Putative leucine-rich repeat receptor-like protein kinase family protein	up	Zm00001d024755	PTI1-like tyrosine-protein kinase 3	up
Zm00001d037973	Serine/threonine-protein kinase	up	Zm00001d026139	Putative calcium-dependent protein kinase family protein	up		Zm00001d037973	Serine/threonine-protein kinase	up	Zm00001d026139	Putative calcium-dependent protein kinase family protein	up		Zm00001d024047	Leucine-rich repeat protein kinase family protein	up	Zm00001d037810	receptor-like protein kinase 4	up		Zm00001d005037	Protein kinase APK1B chloroplast	up	Zm00001d018807	Leucine-rich repeat receptor-like serine/threonine-protein kinase	up
Zm00001d039789	receptor-like protein kinase 4	up	Zm00001d032344	Receptor-like protein kinase HSL1	up		Zm00001d039789	receptor-like protein kinase 4	up	Zm00001d032344	Receptor-like protein kinase HSL1	up		Zm00001d031427	Leucine-rich repeat receptor-like protein kinase PEPR1	up	Zm00001d033193	Serine-threonine protein kinase plant-type	up		Zm00001d043091	Leucine-rich repeat protein kinase family protein	up	Zm00001d021727	G-type lectin S-receptor-like serine/threonine-protein kinase B120	up
Zm00001d045207	Putative S-locus-like receptor protein kinase family protein	up	Zm00001d018352	Protein kinase superfamily protein	up		Zm00001d045207	Putative S-locus-like receptor protein kinase family protein	up	Zm00001d018352	Protein kinase superfamily protein	up		Zm00001d007166	CBL-interacting serine/threonine-protein kinase 4	up	Zm00001d025002	Putative leucine-rich repeat receptor protein kinase family protein	up		Zm00001d050723	SnRK2 serine threonine protein kinase6	up	Zm00001d010961	Putative CRINKLY4-like receptor protein kinase family protein	up
			Zm00001d049588	Putative leucine-rich repeat receptor-like protein kinase family protein	up					Zm00001d049588	Putative leucine-rich repeat receptor-like protein kinase family protein	up		Zm00001d053761	Putative STRUBBELIG family receptor protein kinase	up	Zm00001d038883	Mitogen-activated protein kinase kinase kinase YODA	up		Zm00001d046178	Putative leucine-rich repeat protein kinase family protein	up	Zm00001d002540	calcium dependent protein kinase5	up
			Zm00001d047570	Putative leucine-rich repeat protein kinase family protein	up					Zm00001d047570	Putative leucine-rich repeat protein kinase family protein	up		Zm00001d008715	Putative leucine-rich repeat receptor protein kinase family protein	up	Zm00001d026126	Probable serine/threonine-protein kinase Cx32 chloroplastic	up		Zm00001d031689	PTI1-like tyrosine-protein kinase 3	up	Zm00001d021683	Cysteine-rich receptor-like protein kinase 25	up
			Zm00001d038481	Putative leucine-rich repeat receptor-like protein kinase family protein	up					Zm00001d038481	Putative leucine-rich repeat receptor-like protein kinase family protein	up		Zm00001d032344	Receptor-like protein kinase HSL1	up	Zm00001d018472	Receptor-like serine/threonine-protein kinase ALE2	up		Zm00001d008966	Serine/threonine-protein kinase	up	Zm00001d046838	Putative receptor-like protein kinase family protein	up
			Zm00001d012931	Protein kinase protein with tetratricopeptide repeat domain	up					Zm00001d012931	Protein kinase protein with tetratricopeptide repeat domain	up		Zm00001d038487	Putative leucine-rich repeat receptor-like protein kinase family protein	up	Zm00001d006793	Cysteine-rich receptor-like protein kinase 10	up		Zm00001d005976	Serine/threonine-protein kinase D6PKL1	up	Zm00001d012452	Protein kinase superfamily protein	up
			Zm00001d039406	Receptor-like protein kinase	up					Zm00001d039406	Receptor-like protein kinase	up		Zm00001d021535	LRR receptor-like serine/threonine-protein kinase GSO1	up	Zm00001d008715	Putative leucine-rich repeat receptor protein kinase family protein	up		Zm00001d045124	Protein kinase superfamily protein with octicosapeptide/Phox/Bem1p domain	up	Zm00001d021835	Calcium-dependent protein kinase 7	up
			Zm00001d024430	Putative leucine-rich repeat receptor-like protein kinase family protein	up					Zm00001d024430	Putative leucine-rich repeat receptor-like protein kinase family protein	up		Zm00001d027463	Probable LRR receptor-like serine/threonine-protein kinase	up	Zm00001d011834	Putative leucine-rich repeat receptor-like protein kinase family protein	up		Zm00001d025920	Putative lectin-like receptor protein kinase family protein	up	Zm00001d038432	Putative leucine-rich repeat transmembrane protein kinase family protein	up
			Zm00001d027645	Leucine-rich repeat receptor-like protein kinase PXL1	up					Zm00001d027645	Leucine-rich repeat receptor-like protein kinase PXL1	up		Zm00001d053158	Probable serine/threonine-protein kinase WNK6	up	Zm00001d053998	Putative wee1-like protein kinase	up		Zm00001d002599	Probable LRR receptor-like serine/threonine-protein kinase	up	Zm00001d053818	Protein kinase superfamily protein	up
			Zm00001d045481	Putative leucine-rich repeat receptor-like protein kinase family protein	up					Zm00001d045481	Putative leucine-rich repeat receptor-like protein kinase family protein	up		Zm00001d043959	Protein kinase superfamily protein	up	Zm00001d037898	Protein kinase superfamily protein	up		Zm00001d033339	Serine/threonine-protein kinase SRK2E	up	Zm00001d028447	Serine/threonine-protein kinase WAG2	up
			Zm00001d029059	Probable LRR receptor-like serine/threonine-protein kinase IRK	up					Zm00001d029059	Probable LRR receptor-like serine/threonine-protein kinase IRK	up		Zm00001d034240	Leucine-rich repeat receptor-like serine/threonine-protein kinase BAM3	up	Zm00001d005986	Probable LRR receptor-like serine/threonine-protein kinase	up		Zm00001d010662	SNF1-related protein kinase regulatory subunit beta-1	up	Zm00001d009473	Putative WAK receptor-like protein kinase family protein	up
			Zm00001d048453	Putative leucine-rich repeat transmembrane protein kinase family protein	up					Zm00001d048453	Putative leucine-rich repeat transmembrane protein kinase family protein	up		Zm00001d007254	Leucine-rich repeat receptor-like serine/threonine-protein kinase BAM3	up	Zm00001d016220	LRR receptor-like serine/threonine-protein kinase RCH1	up		Zm00001d014056	LRR receptor-like serine/threonine-protein kinase FLS2	up	Zm00001d002287	LRR receptor-like serine/threonine-protein kinase FLS2	up
			Zm00001d038487	Putative leucine-rich repeat receptor-like protein kinase family protein	up					Zm00001d038487	Putative leucine-rich repeat receptor-like protein kinase family protein	up					Zm00001d014583	Protein kinase superfamily protein	up		Zm00001d026004	Putative WAK-related receptor-like protein kinase family protein	up	Zm00001d041327	Probable LRR receptor-like serine/threonine-protein kinase	up
			Zm00001d039465	Protein kinase superfamily protein	up					Zm00001d039465	Protein kinase superfamily protein	up					Zm00001d031785	receptor-like protein kinase 4	up		Zm00001d009814	Putative leucine-rich repeat receptor-like protein kinase family protein	up	Zm00001d006844	Protein kinase	up
			Zm00001d025997	Protein kinase superfamily protein	up					Zm00001d025997	Protein kinase superfamily protein	up					Zm00001d021948	Probable serine/threonine-protein kinase WNK11	up		Zm00001d018754	Probable LRR receptor-like serine/threonine-protein kinase	up	Zm00001d052835	Putative leucine-rich repeat receptor protein kinase family protein	up
			Zm00001d011312	Putative leucine-rich repeat receptor-like protein kinase family protein	up					Zm00001d011312	Putative leucine-rich repeat receptor-like protein kinase family protein	up					Zm00001d001786	Probable LRR receptor-like serine/threonine-protein kinase	up		Zm00001d043257	G-type lectin S-receptor-like serine/threonine-protein kinase CES101	up	Zm00001d012931	Protein kinase protein with tetratricopeptide repeat domain	up
			Zm00001d040324	Serine/threonine-protein kinase-like protein	up					Zm00001d040324	Serine/threonine-protein kinase-like protein	up					Zm00001d011832	G-type lectin S-receptor-like serine/threonine-protein kinase SD2-5	up		Zm00001d018983	Serine/threonine-protein kinase WNK2	up	Zm00001d052376	protein kinase homolog2	up
			Zm00001d033339	Serine/threonine-protein kinase SRK2E	up					Zm00001d033339	Serine/threonine-protein kinase SRK2E	up					Zm00001d021487	receptor-like protein kinase 4	up		Zm00001d014971	Leucine-rich repeat receptor-like protein kinase PXL1	up	Zm00001d028514	Mitogen-activated protein kinase kinase kinase 1	up
			Zm00001d002287	LRR receptor-like serine/threonine-protein kinase FLS2	up					Zm00001d002287	LRR receptor-like serine/threonine-protein kinase FLS2	up					Zm00001d018502	Protein kinase superfamily protein	up		Zm00001d020148	AT1G52290 (E=2e-016) | protein kinase family protein	up	Zm00001d026306	Putative leucine-rich repeat receptor-like protein kinase family protein	up
			Zm00001d020862	Probable LRR receptor-like serine/threonine-protein kinase	up					Zm00001d020862	Probable LRR receptor-like serine/threonine-protein kinase	up					Zm00001d008633	Putative leucine-rich repeat receptor-like protein kinase family protein	up		Zm00001d039325	Putative inactive receptor-like protein kinase	up	Zm00001d038522	Putative leucine-rich repeat receptor-like protein kinase family protein	up
			Zm00001d034405	Probable inactive leucine-rich repeat receptor-like protein kinase	up					Zm00001d034405	Probable inactive leucine-rich repeat receptor-like protein kinase	up					Zm00001d004698	Serine/threonine-protein kinase-like protein CCR4	up		Zm00001d009660	Protein kinase superfamily protein	up	Zm00001d048832	Putative leucine-rich repeat receptor-like protein kinase family protein	up
			Zm00001d039218	Leucine-rich repeat receptor-like serine/threonine-protein kinase BAM3	up					Zm00001d039218	Leucine-rich repeat receptor-like serine/threonine-protein kinase BAM3	up					Zm00001d031426	Serine/threonine-protein kinase UCNL	up		Zm00001d014789	protein; Receptor-like protein kinase-like	up	Zm00001d049713	Putative CRINKLY4-like receptor protein kinase family protein	up
			Zm00001d025002	Putative leucine-rich repeat receptor protein kinase family protein	up					Zm00001d025002	Putative leucine-rich repeat receptor protein kinase family protein	up					Zm00001d018541	Inactive leucine-rich repeat receptor-like serine/threonine-protein kinase	up		Zm00001d051125	LRR receptor-like serine/threonine-protein kinase EFR	up	Zm00001d004698	Serine/threonine-protein kinase-like protein CCR4	up
			Zm00001d037666	LRR receptor-like serine/threonine-protein kinase GSO1	up					Zm00001d037666	LRR receptor-like serine/threonine-protein kinase GSO1	up					Zm00001d029059	Probable LRR receptor-like serine/threonine-protein kinase IRK	up		Zm00001d049286	LRR receptor-like serine/threonine-protein kinase EFR	up	Zm00001d020703	G-type lectin S-receptor-like serine/threonine-protein kinase	up
			Zm00001d005696	NPK1-related protein kinase 2	up					Zm00001d005696	NPK1-related protein kinase 2	up					Zm00001d046485	Putative leucine-rich repeat receptor protein kinase family protein	up		Zm00001d034901	Receptor protein kinase-like protein	up	Zm00001d005976	Serine/threonine-protein kinase D6PKL1	up
			Zm00001d046561	Protein kinase superfamily protein	up					Zm00001d046561	Protein kinase superfamily protein	up					Zm00001d021684	Cysteine-rich receptor-like protein kinase 25	up		Zm00001d008633	Putative leucine-rich repeat receptor-like protein kinase family protein	up	Zm00001d027480	Calcium-dependent protein kinase 6	up
			Zm00001d042268	Receptor-like protein kinase 5	up					Zm00001d042268	Receptor-like protein kinase 5	up					Zm00001d043959	Protein kinase superfamily protein	up		Zm00001d009694	Receptor like protein kinase S.2	up	Zm00001d028386	Protein kinase superfamily protein	up
			Zm00001d020858	Serine/threonine-protein kinase D6PKL1	up					Zm00001d020858	Serine/threonine-protein kinase D6PKL1	up					Zm00001d043058	Probable LRR receptor-like serine/threonine-protein kinase IRK	up		Zm00001d003101	Probable leucine-rich repeat receptor-like protein kinase	up	Zm00001d036402	protein; Receptor-like protein kinase-like	up
			Zm00001d051343	Protein kinase superfamily protein	up					Zm00001d051343	Protein kinase superfamily protein	up					Zm00001d022044	Probable LRR receptor-like serine/threonine-protein kinase	up		Zm00001d043058	Probable LRR receptor-like serine/threonine-protein kinase IRK	up	Zm00001d053518	Putative leucine-rich repeat protein kinase family protein	up
			Zm00001d034240	Leucine-rich repeat receptor-like serine/threonine-protein kinase BAM3	up					Zm00001d034240	Leucine-rich repeat receptor-like serine/threonine-protein kinase BAM3	up					Zm00001d032408	G-type lectin S-receptor-like serine/threonine-protein kinase B120	up		Zm00001d034405	Probable inactive leucine-rich repeat receptor-like protein kinase	up	Zm00001d038883	Mitogen-activated protein kinase kinase kinase YODA	up
			Zm00001d003673	Protein kinase superfamily protein	up					Zm00001d003673	Protein kinase superfamily protein	up					Zm00001d026004	Putative WAK-related receptor-like protein kinase family protein	up		Zm00001d034788	Protein kinase protein with adenine nucleotide alpha hydrolases-like domain	up	Zm00001d008966	Serine/threonine-protein kinase	up
			Zm00001d017473	Protein kinase superfamily protein	up					Zm00001d017473	Protein kinase superfamily protein	up					Zm00001d039789	receptor-like protein kinase 4	up		Zm00001d002776	Probable receptor-like protein kinase	up	Zm00001d053120	Putative lysM-domain receptor-like protein kinase family protein	up
			Zm00001d005986	Probable LRR receptor-like serine/threonine-protein kinase	up					Zm00001d005986	Probable LRR receptor-like serine/threonine-protein kinase	up					Zm00001d042051	Probably inactive leucine-rich repeat receptor-like protein kinase	up		Zm00001d016242	Probable leucine-rich repeat receptor-like serine/threonine-protein kinase	up	Zm00001d035467	Putative CRINKLY4-like receptor protein kinase family protein	up
			Zm00001d040127	Proline-rich receptor-like protein kinase PERK10	up					Zm00001d040127	Proline-rich receptor-like protein kinase PERK10	up					Zm00001d006535	Cysteine-rich receptor-like protein kinase 10	up		Zm00001d031407	Protein kinase superfamily protein	up	Zm00001d016242	Probable leucine-rich repeat receptor-like serine/threonine-protein kinase	up
			Zm00001d030999	Serine/threonine-protein kinase Nek1	up					Zm00001d030999	Serine/threonine-protein kinase Nek1	up					Zm00001d021683	Cysteine-rich receptor-like protein kinase 25	up		Zm00001d038549	Putative DUF26-domain receptor-like protein kinase family protein	up	Zm00001d005682	Protein kinase superfamily protein	up
			Zm00001d037811	Proline-rich receptor-like protein kinase PERK1	up					Zm00001d037811	Proline-rich receptor-like protein kinase PERK1	up					Zm00001d008966	Serine/threonine-protein kinase	up		Zm00001d013997	Cysteine-rich receptor-like protein kinase 2	up	Zm00001d048453	Putative leucine-rich repeat transmembrane protein kinase family protein	up
			Zm00001d028770	Protein kinase superfamily protein	up					Zm00001d028770	Protein kinase superfamily protein	up					Zm00001d002905	Protein kinase superfamily protein	up		Zm00001d042131	Serine/threonine-protein kinase TIO	up	Zm00001d010234	Probable receptor-like protein kinase	up
			Zm00001d008433	Putative prolin-rich extensin-like receptor protein kinase family protein	up					Zm00001d008433	Putative prolin-rich extensin-like receptor protein kinase family protein	up					Zm00001d043512	Protein kinase family protein with leucine-rich repeat domain	up		Zm00001d019474	Receptor-like protein kinase-related family protein	up	Zm00001d043253	Receptor-like serine/threonine-protein kinase SD1-8	up
			Zm00001d036771	Protein kinase superfamily protein	up					Zm00001d036771	Protein kinase superfamily protein	up					Zm00001d002599	Probable LRR receptor-like serine/threonine-protein kinase	up		Zm00001d018541	Inactive leucine-rich repeat receptor-like serine/threonine-protein kinase	up	Zm00001d032857	Protein kinase superfamily protein	up
			Zm00001d020496	CBL-interacting serine/threonine-protein kinase 5	up					Zm00001d020496	CBL-interacting serine/threonine-protein kinase 5	up									Zm00001d011211	Putative leucine-rich repeat protein kinase family protein	up	Zm00001d040127	Proline-rich receptor-like protein kinase PERK10	up
			Zm00001d038432	Putative leucine-rich repeat transmembrane protein kinase family protein	up					Zm00001d038432	Putative leucine-rich repeat transmembrane protein kinase family protein	up									Zm00001d037973	Serine/threonine-protein kinase	up	Zm00001d022451	CBL-interacting serine/threonine-protein kinase 11	up
			Zm00001d039180	Protein kinase superfamily protein	up					Zm00001d039180	Protein kinase superfamily protein	up									Zm00001d038487	Putative leucine-rich repeat receptor-like protein kinase family protein	up	Zm00001d043512	Protein kinase family protein with leucine-rich repeat domain	up
			Zm00001d020497	CBL-interacting serine/threonine-protein kinase 6	up					Zm00001d020497	CBL-interacting serine/threonine-protein kinase 6	up									Zm00001d024134	Putative receptor-like protein kinase	up	Zm00001d032310	Protein kinase superfamily protein	up
			Zm00001d034689	TPR-containing protein kinase	up					Zm00001d034689	TPR-containing protein kinase	up									Zm00001d053761	Putative STRUBBELIG family receptor protein kinase	up	Zm00001d008321	Serine/threonine-protein kinase RUNKEL	up
			Zm00001d002835	Probable LRR receptor-like serine/threonine-protein kinase	up					Zm00001d002835	Probable LRR receptor-like serine/threonine-protein kinase	up									Zm00001d052989	Cysteine-rich receptor-like protein kinase 6	up	Zm00001d048054	Putative leucine-rich repeat receptor-like protein kinase family protein	up
			Zm00001d005252	Leucine-rich repeat receptor-like tyrosine-protein kinase PXC3	up					Zm00001d005252	Leucine-rich repeat receptor-like tyrosine-protein kinase PXC3	up									Zm00001d008321	Serine/threonine-protein kinase RUNKEL	up	Zm00001d017042	Serine/threonine-protein kinase Nek4	up
			Zm00001d046655	Putative STRUBBELIG family receptor protein kinase	up					Zm00001d046655	Putative STRUBBELIG family receptor protein kinase	up									Zm00001d053998	Putative wee1-like protein kinase	up	Zm00001d025342	Serine/threonine-protein kinase KIPK	up
			Zm00001d029948	Serine/threonine-protein kinase D6PKL1	up					Zm00001d029948	Serine/threonine-protein kinase D6PKL1	up									Zm00001d043256	G-type lectin S-receptor-like serine/threonine-protein kinase B120	up	Zm00001d002167	Protein kinase superfamily protein	up
			Zm00001d043252	Serine/threonine-protein kinase	up					Zm00001d043252	Serine/threonine-protein kinase	up									Zm00001d053876	Protein kinase protein with adenine nucleotide alpha hydrolases-like domain	up	Zm00001d003070	Protein kinase superfamily protein	up
			Zm00001d039427	Protein kinase superfamily protein	up					Zm00001d039427	Protein kinase superfamily protein	up									Zm00001d046485	Putative leucine-rich repeat receptor protein kinase family protein	up	Zm00001d023560	Putative calcium-dependent protein kinase family protein	up
			Zm00001d012216	Probable receptor-like protein kinase	up					Zm00001d012216	Probable receptor-like protein kinase	up									Zm00001d025065	Putative D-mannose binding lectin receptor-like protein kinase family protein	up	Zm00001d034405	Probable inactive leucine-rich repeat receptor-like protein kinase	up
			Zm00001d025959	Probable receptor-like protein kinase	up					Zm00001d025959	Probable receptor-like protein kinase	up									Zm00001d030171	Serine/threonine-protein kinase	up	Zm00001d043056	Protein kinase superfamily protein	up
			Zm00001d029721	Probable serine/threonine-protein kinase	up					Zm00001d029721	Probable serine/threonine-protein kinase	up									Zm00001d053133	Protein kinase superfamily protein	up	Zm00001d018752	Leucine-rich repeat receptor-like serine/threonine-protein kinase BAM1	up
			Zm00001d042747	Serine/threonine-protein kinase Nek5	up					Zm00001d042747	Serine/threonine-protein kinase Nek5	up									Zm00001d002198	Receptor-like serine/threonine-protein kinase SD1-8	up	Zm00001d020858	Serine/threonine-protein kinase D6PKL1	up
			Zm00001d026126	Probable serine/threonine-protein kinase Cx32 chloroplastic	up					Zm00001d026126	Probable serine/threonine-protein kinase Cx32 chloroplastic	up									Zm00001d013572	Cysteine-rich receptor-like protein kinase 10	up	Zm00001d028317	Leucine-rich repeat receptor-like serine/threonine-protein kinase BAM3	up
			Zm00001d048054	Putative leucine-rich repeat receptor-like protein kinase family protein	up					Zm00001d048054	Putative leucine-rich repeat receptor-like protein kinase family protein	up									Zm00001d043056	Protein kinase superfamily protein	up	Zm00001d046488	Leucine-rich repeat protein kinase family protein	up
			Zm00001d038485	Serine/threonine-protein kinase STN8 chloroplastic	up					Zm00001d038485	Serine/threonine-protein kinase STN8 chloroplastic	up									Zm00001d012769	Protein kinase family protein with leucine-rich repeat domain	up	Zm00001d046626	Putative leucine-rich repat protein kinase family protein	up
			Zm00001d048070	Putative leucine-rich repeat protein kinase family protein	up					Zm00001d048070	Putative leucine-rich repeat protein kinase family protein	up									Zm00001d025997	Protein kinase superfamily protein	up	Zm00001d033339	Serine/threonine-protein kinase SRK2E	up
			Zm00001d018541	Inactive leucine-rich repeat receptor-like serine/threonine-protein kinase	up					Zm00001d018541	Inactive leucine-rich repeat receptor-like serine/threonine-protein kinase	up									Zm00001d036613	LRR receptor-like serine/threonine-protein kinase EFR	up	Zm00001d041298	LRR receptor-like serine/threonine-protein kinase EFR	up
			Zm00001d005776	Putative leucine-rich repeat receptor-like serine/threonine-protein kinase	up					Zm00001d005776	Putative leucine-rich repeat receptor-like serine/threonine-protein kinase	up									Zm00001d041941	Leucine-rich repeat protein kinase family protein	up	Zm00001d030796	Serine-threonine protein kinase plant-type	up
			Zm00001d046236	Putative leucine-rich repeat receptor-like protein kinase family protein	up					Zm00001d046236	Putative leucine-rich repeat receptor-like protein kinase family protein	up									Zm00001d045785	Leucine-rich repeat receptor-like serine/threonine/tyrosine-protein kinase SOBIR1	up
			Zm00001d003925	Serine/threonine-protein kinase PBS1	up					Zm00001d003925	Serine/threonine-protein kinase PBS1	up									Zm00001d022044	Probable LRR receptor-like serine/threonine-protein kinase	up
			Zm00001d018883	Probable inactive leucine-rich repeat receptor-like protein kinase	up					Zm00001d018883	Probable inactive leucine-rich repeat receptor-like protein kinase	up									Zm00001d011912	Putative transmembrane protein kinase family protein	up
			Zm00001d043959	Protein kinase superfamily protein	up					Zm00001d043959	Protein kinase superfamily protein	up									Zm00001d031785	receptor-like protein kinase 4	up
			Zm00001d041941	Leucine-rich repeat protein kinase family protein	up					Zm00001d041941	Leucine-rich repeat protein kinase family protein	up									Zm00001d009473	Putative WAK receptor-like protein kinase family protein	up
			Zm00001d049159	Putative leucine-rich repeat receptor-like protein kinase family protein	up					Zm00001d049159	Putative leucine-rich repeat receptor-like protein kinase family protein	up									Zm00001d031395	Protein kinase superfamily protein	up
			Zm00001d003072	Receptor-like serine/threonine-protein kinase ALE2	up					Zm00001d003072	Receptor-like serine/threonine-protein kinase ALE2	up									Zm00001d031427	Leucine-rich repeat receptor-like protein kinase PEPR1	up
			Zm00001d030796	Serine-threonine protein kinase plant-type	up					Zm00001d030796	Serine-threonine protein kinase plant-type	up									Zm00001d042051	Probably inactive leucine-rich repeat receptor-like protein kinase	up
			Zm00001d036775	Putative STRUBBELIG family receptor protein kinase	up					Zm00001d036775	Putative STRUBBELIG family receptor protein kinase	up									Zm00001d030981	Leucine-rich repeat protein kinase family protein	up
			Zm00001d021535	LRR receptor-like serine/threonine-protein kinase GSO1	up					Zm00001d021535	LRR receptor-like serine/threonine-protein kinase GSO1	up									Zm00001d031372	Protein kinase superfamily protein	up
			Zm00001d039141	Mitogen-activated protein kinase 20	up					Zm00001d039141	Mitogen-activated protein kinase 20	up									Zm00001d031351	Protein kinase superfamily protein	up
			Zm00001d039654	Protein kinase PINOID 2	up					Zm00001d039654	Protein kinase PINOID 2	up									Zm00001d028317	Leucine-rich repeat receptor-like serine/threonine-protein kinase BAM3	up
			Zm00001d003670	Protein kinase superfamily protein	up					Zm00001d003670	Protein kinase superfamily protein	up									Zm00001d048832	Putative leucine-rich repeat receptor-like protein kinase family protein	up
			Zm00001d004866	Protein kinase family protein	up					Zm00001d004866	Protein kinase family protein	up									Zm00001d021683	Cysteine-rich receptor-like protein kinase 25	up
			Zm00001d038484	protein kinase-related	up					Zm00001d038484	protein kinase-related	up									Zm00001d008279	Serine/threonine-protein kinase-like protein	up
			Zm00001d041232	Leucine-rich repeat transmembrane protein kinase family protein	up					Zm00001d041232	Leucine-rich repeat transmembrane protein kinase family protein	up									Zm00001d013376	Probable LRR receptor-like serine/threonine-protein kinase	up
			Zm00001d038282	Putative LSTK-1-like/NimA-related protein kinase family protein isoform 1%3B Putative LSTK-1-like/NimA-related protein kinase family protein isoform 2	up					Zm00001d038282	Putative LSTK-1-like/NimA-related protein kinase family protein isoform 1%3B Putative LSTK-1-like/NimA-related protein kinase family protein isoform 2	up									Zm00001d044276	Leucine-rich repeat protein kinase family protein	up
			Zm00001d047990	Probable receptor-like serine/threonine-protein kinase	up					Zm00001d047990	Probable receptor-like serine/threonine-protein kinase	up									Zm00001d043959	Protein kinase superfamily protein	up
			Zm00001d041439	Serine/threonine-protein kinase Nek1	up					Zm00001d041439	Serine/threonine-protein kinase Nek1	up									Zm00001d018789	Probable receptor-like protein kinase	up
			Zm00001d031040	AGC (cAMP-dependent cGMP-dependent and protein kinase C) kinase family protein	up					Zm00001d031040	AGC (cAMP-dependent cGMP-dependent and protein kinase C) kinase family protein	up									Zm00001d045839	Putative lectin-like receptor protein kinase family protein	up
			Zm00001d036735	Protein kinase superfamily protein	up					Zm00001d036735	Protein kinase superfamily protein	up									Zm00001d021286	Protein kinase superfamily protein	up
			Zm00001d014850	Probable serine/threonine-protein kinase Cx32 chloroplastic	up					Zm00001d014850	Probable serine/threonine-protein kinase Cx32 chloroplastic	up									Zm00001d015884	Protein kinase	up
			Zm00001d040691	Probable receptor-like protein kinase	up					Zm00001d040691	Probable receptor-like protein kinase	up									Zm00001d045445	Putative leucine-rich repeat protein kinase family protein	up
			Zm00001d025342	Serine/threonine-protein kinase KIPK	up					Zm00001d025342	Serine/threonine-protein kinase KIPK	up									Zm00001d042013	receptor-like protein kinase 1	up
			Zm00001d049741	Putative lectin-domain receptor-like protein kinase family protein	up					Zm00001d049741	Putative lectin-domain receptor-like protein kinase family protein	up									Zm00001d020703	G-type lectin S-receptor-like serine/threonine-protein kinase	up
			Zm00001d011912	Putative transmembrane protein kinase family protein	up					Zm00001d011912	Putative transmembrane protein kinase family protein	up									Zm00001d018752	Leucine-rich repeat receptor-like serine/threonine-protein kinase BAM1	up
			Zm00001d033193	Serine-threonine protein kinase plant-type	up					Zm00001d033193	Serine-threonine protein kinase plant-type	up									Zm00001d038551	Putative DUF26-domain receptor-like protein kinase family protein	up
			Zm00001d041063	Serine/threonine-protein kinase KIPK	up					Zm00001d041063	Serine/threonine-protein kinase KIPK	up									Zm00001d034689	TPR-containing protein kinase	up
			Zm00001d014583	Protein kinase superfamily protein	up					Zm00001d014583	Protein kinase superfamily protein	up									Zm00001d018185	G-type lectin S-receptor-like serine/threonine-protein kinase	up
			Zm00001d021689	Receptor-like protein kinase RK20-1	up					Zm00001d021689	Receptor-like protein kinase RK20-1	up									Zm00001d020355	NPK1-related protein kinase 2	up
			Zm00001d040160	Protein kinase superfamily protein	up					Zm00001d040160	Protein kinase superfamily protein	up									Zm00001d008632	LRR receptor-like serine/threonine-protein kinase EFR	up
			Zm00001d031201	Leucine-rich repeat transmembrane protein kinase family protein	up					Zm00001d031201	Leucine-rich repeat transmembrane protein kinase family protein	up									Zm00001d027415	Serine/threonine-protein kinase ATG1a	up
			Zm00001d046626	Putative leucine-rich repat protein kinase family protein	up					Zm00001d046626	Putative leucine-rich repat protein kinase family protein	up									Zm00001d011378	Putative DUF1221-domain containing protein kinase family protein	up
			Zm00001d042500	PTI1-like tyrosine-protein kinase 3	up					Zm00001d042500	PTI1-like tyrosine-protein kinase 3	up									Zm00001d034166	Serine/threonine-protein kinase Aurora-3	up
			Zm00001d037829	Probable receptor-like protein kinase	up					Zm00001d037829	Probable receptor-like protein kinase	up									Zm00001d035097	Putative leucine-rich repeat protein kinase family protein	up
			Zm00001d027463	Probable LRR receptor-like serine/threonine-protein kinase	up					Zm00001d027463	Probable LRR receptor-like serine/threonine-protein kinase	up									Zm00001d018502	Protein kinase superfamily protein	up
			Zm00001d018752	Leucine-rich repeat receptor-like serine/threonine-protein kinase BAM1	up					Zm00001d018752	Leucine-rich repeat receptor-like serine/threonine-protein kinase BAM1	up									Zm00001d011157	Putative DUF26-domain receptor-like protein kinase family protein	up
			Zm00001d048968	Putative leucine-rich repeat receptor-like protein kinase family protein	up					Zm00001d048968	Putative leucine-rich repeat receptor-like protein kinase family protein	up									Zm00001d031366	Protein kinase superfamily protein	up
			Zm00001d019145	Leucine-rich repeat receptor-like tyrosine-protein kinase PXC3	up					Zm00001d019145	Leucine-rich repeat receptor-like tyrosine-protein kinase PXC3	up									Zm00001d014813	Serine/threonine-protein kinase ATR	up
			Zm00001d002282	Probable receptor-like protein kinase	up					Zm00001d002282	Probable receptor-like protein kinase	up									Zm00001d049145	Putative CRINKLY4-like receptor protein kinase family protein	up
			Zm00001d001786	Probable LRR receptor-like serine/threonine-protein kinase	up					Zm00001d001786	Probable LRR receptor-like serine/threonine-protein kinase	up									Zm00001d003072	Receptor-like serine/threonine-protein kinase ALE2	up
			Zm00001d002757	Protein kinase superfamily protein	up					Zm00001d002757	Protein kinase superfamily protein	up									Zm00001d037811	Proline-rich receptor-like protein kinase PERK1	up
			Zm00001d030323	Leucine-rich repeat receptor-like protein kinase PEPR1	up					Zm00001d030323	Leucine-rich repeat receptor-like protein kinase PEPR1	up									Zm00001d034240	Leucine-rich repeat receptor-like serine/threonine-protein kinase BAM3	up
			Zm00001d007254	Leucine-rich repeat receptor-like serine/threonine-protein kinase BAM3	up					Zm00001d007254	Leucine-rich repeat receptor-like serine/threonine-protein kinase BAM3	up									Zm00001d045086	Putative leucine-rich repeat receptor-like protein kinase family protein	up
			Zm00001d011666	Putative calcium-dependent protein kinase family protein	up					Zm00001d011666	Putative calcium-dependent protein kinase family protein	up									Zm00001d025002	Putative leucine-rich repeat receptor protein kinase family protein	up
			Zm00001d028514	Mitogen-activated protein kinase kinase kinase 1	up					Zm00001d028514	Mitogen-activated protein kinase kinase kinase 1	up									Zm00001d040324	Serine/threonine-protein kinase-like protein	up
			Zm00001d011654	Putative MAPKKK family protein kinase	up					Zm00001d011654	Putative MAPKKK family protein kinase	up									Zm00001d038115	Putative DUF26-domain receptor-like protein kinase family protein	up
			Zm00001d008875	Protein kinase superfamily protein	up					Zm00001d008875	Protein kinase superfamily protein	up									Zm00001d004635	Leucine-rich repeat protein kinase family protein	up
			Zm00001d026063	Putative leucine-rich repeat receptor-like protein kinase family protein	up					Zm00001d026063	Putative leucine-rich repeat receptor-like protein kinase family protein	up									Zm00001d052906	Putative lectin-domain receptor-like protein kinase family protein	up
			Zm00001d020927	Serine/threonine-protein kinase UCNL	up					Zm00001d020927	Serine/threonine-protein kinase UCNL	up									Zm00001d020927	Serine/threonine-protein kinase UCNL	up
			Zm00001d038135	Protein kinase superfamily protein	up					Zm00001d038135	Protein kinase superfamily protein	up									Zm00001d033193	Serine-threonine protein kinase plant-type	up
			Zm00001d043562	Proline-rich receptor-like protein kinase PERK10	up					Zm00001d043562	Proline-rich receptor-like protein kinase PERK10	up									Zm00001d030555	receptor-like protein kinase 1	up
			Zm00001d053158	Probable serine/threonine-protein kinase WNK6	up					Zm00001d053158	Probable serine/threonine-protein kinase WNK6	up									Zm00001d046370	Serine/threonine-protein kinase	up
			Zm00001d016765	Protein kinase superfamily protein	up					Zm00001d016765	Protein kinase superfamily protein	up									Zm00001d052375	Protein kinase APK1B chloroplast	up
			Zm00001d042131	Serine/threonine-protein kinase TIO	up					Zm00001d042131	Serine/threonine-protein kinase TIO	up									Zm00001d008891	G-type lectin S-receptor-like serine/threonine-protein kinase SD2-5	up
																					Zm00001d002979	Protein kinase superfamily protein	up
