# Supplementary material for: Network Analysis of Different Exogenous Hormones on the Regulation of Deep Sowing Tolerance in Maize Seedlings
Source: Front Plant Sci. 2021 Dec 2;12:739101. doi: 10.3389/fpls.2021.739101 (PMC8674439; doi:10.3389/fpls.2021.739101)
Supplement: Supplementary file 11 [file Table_10.XLSX]

## Sheet: Sheet1
Expression of protein phosphatase 2C in both inbred lines under deep sowing stress
Gene_ID	Description	regulation (QDS VS QCK)		Gene_ID	Description	regulation (ZDS VS ZCK)
Zm00001d048131	Probable protein phosphatase 2C 63	up		Zm00001d028574	Protein phosphatase 2C 37	down
Zm00001d039745	Protein phosphatase 2C	down		Zm00001d028752	Probable protein phosphatase 2C 30	down
Zm00001d044525	Protein phosphatase 2C 57	down		Zm00001d047732	Probable protein phosphatase 2C 30	down
Zm00001d013220	Probable protein phosphatase 2C 48	up		Zm00001d048131	Probable protein phosphatase 2C 63	down
Zm00001d053313	Protein phosphatase 2C and cyclic nucleotide-binding/kinase domain-containing protein	down		Zm00001d034655	Probable protein phosphatase 2C 4	down
Zm00001d006614	Probable protein phosphatase 2C 1	up		Zm00001d053313	Protein phosphatase 2C and cyclic nucleotide-binding/kinase domain-containing protein	down
Zm00001d035263	Probable protein phosphatase 2C 30	up
Zm00001d005071	Probable protein phosphatase 2C 65	down
Zm00001d012962	Probable protein phosphatase 2C 4	up
Zm00001d029419	Probable protein phosphatase 2C 12	up
Zm00001d025548	Probable protein phosphatase 2C 12	up
Zm00001d022347	Probable protein phosphatase 2C 35	up
Zm00001d047679	Probable protein phosphatase 2C 5	up
Expression of protein phosphatase 2C in both inbred lines under GA treatment
Gene_ID	Description	regulation (QDSGA VS QCKGA)		Gene_ID	Description	regulation (ZDSGA VS ZCKGA)
Zm00001d015279	Probable protein phosphatase 2C 59	down		Zm00001d006254	Serine/threonine protein phosphatase 2A 59 kDa regulatory subunit B' zeta isoform	up
Zm00001d053313	Protein phosphatase 2C and cyclic nucleotide-binding/kinase domain-containing protein	down		Zm00001d009500	Serine/threonine protein phosphatase 2A 57 kDa regulatory subunit B' iota isoform	up
Zm00001d028752	Probable protein phosphatase 2C 30	down		Zm00001d047679	Probable protein phosphatase 2C 5	up
Zm00001d015504	Protein phosphatase 2C isoform gamma	down		Zm00001d025055	protein phosphatase homolog11	down
Zm00001d025055	protein phosphatase homolog11	down		Zm00001d049127	Putative serine/threonine protein phosphatase superfamily protein	down
Zm00001d017643	Catalytic/ protein phosphatase type 2C	up		Zm00001d017643	Catalytic/ protein phosphatase type 2C	up
Zm00001d009626	protein phosphatase homolog9	down		Zm00001d015504	Protein phosphatase 2C isoform gamma	down
Zm00001d018209	Tyrosine specific protein phosphatase family protein	up		Zm00001d037150	Probable tyrosine-protein phosphatase	up
Zm00001d039745	Protein phosphatase 2C	down		Zm00001d014291	Probable protein phosphatase 2C 71	up
Expression of protein phosphatase 2C in both inbred lines under BR treatment
Gene_ID	Description	regulation (QDSBR VS QCKBR)		Gene_ID	Description	regulation (ZDSBR VS ZCKBR)
Zm00001d039745	Protein phosphatase 2C	down		Zm00001d034655	Probable protein phosphatase 2C 4	down
Zm00001d044525	Protein phosphatase 2C 57	down		Zm00001d012962	Probable protein phosphatase 2C 4	down
Zm00001d053313	Protein phosphatase 2C and cyclic nucleotide-binding/kinase domain-containing protein	down
Zm00001d005071	Probable protein phosphatase 2C 65	down
Zm00001d029419	Probable protein phosphatase 2C 12	up
Zm00001d048131	Probable protein phosphatase 2C 63	up
Expression of protein phosphatase 2C in both inbred lines under SL treatment
Gene_ID	Description	regulation (QDSSL VS QCKSL)		Gene_ID	Description	regulation (ZDSSL VS ZCKSL)
Zm00001d053313	Protein phosphatase 2C and cyclic nucleotide-binding/kinase domain-containing protein	down		Zm00001d047732	Probable protein phosphatase 2C 30	down
Zm00001d044525	Protein phosphatase 2C 57	down		Zm00001d048203	Probable protein phosphatase 2C BIPP2C1	down
Zm00001d011202	Protein phosphatase 2C 16	down		Zm00001d053313	Protein phosphatase 2C and cyclic nucleotide-binding/kinase domain-containing protein	down
Zm00001d034109	Probable protein phosphatase 2C 48	down		Zm00001d020726	Probable protein phosphatase 2C 12	up
Zm00001d028752	Probable protein phosphatase 2C 30	down		Zm00001d014291	Probable protein phosphatase 2C 71	up
Zm00001d011131	Protein phosphatase 2C 16	down		Zm00001d015504	Protein phosphatase 2C isoform gamma	down
Zm00001d006614	Probable protein phosphatase 2C 1	up		Zm00001d048359	Probable protein phosphatase 2C 48	down
Zm00001d005071	Probable protein phosphatase 2C 65	down		Zm00001d028752	Probable protein phosphatase 2C 30	down
Zm00001d029419	Probable protein phosphatase 2C 12	up		Zm00001d012962	Probable protein phosphatase 2C 4	up
Zm00001d047679	Probable protein phosphatase 2C 5	down		Zm00001d035263	Probable protein phosphatase 2C 30	up
Zm00001d022347	Probable protein phosphatase 2C 35	up		Zm00001d053566	Probable protein phosphatase 2C 72	down
Zm00001d039745	Protein phosphatase 2C	down
Zm00001d012962	Probable protein phosphatase 2C 4	up
